# Supplementary material for: Palladium-catalyzed conjugate addition of arylsulfonyl hydrazides to α,β-unsaturated ketones
Source: Royal Society of Chemistry journal article supplement (doi:10.1039/c3ob40518d), 2013-01-01

## Supporting information for

# **Palladium-catalyzed conjugate addition of arylsulfonyl hydrazides with $\alpha,\beta$ -unsaturated ketones**

Wen Chen, Hui Chen, Fuhong Xiao, Guo-Jun Deng\*

Key Laboratory for Environmentally Friendly Chemistry and Application of Ministry of

Education College of Chemistry, Xiangtan University, Xiangtan 411105, China

E-mail: gjdeng@xtu.edu.cn

## Table of Contents

|                                                                                                    |              |
|----------------------------------------------------------------------------------------------------|--------------|
| <b>1. General information</b>                                                                      | <b>2</b>     |
| <b>2. General procedure for substrate preparation</b>                                              | <b>2</b>     |
| <b>3. General procedure for desulfitative conjugate addition</b>                                   | <b>3</b>     |
| <b>4. Characterization data of products</b>                                                        | <b>3-12</b>  |
| <b>5. References</b>                                                                               | <b>13</b>    |
| <b>6. Copies of <math>^1\text{H}</math> and <math>^{13}\text{C}</math> NMR spectra of products</b> | <b>14-32</b> |

### General information:

All experiments were carried out under an atmosphere of oxygen. Flash column chromatography was performed over silica gel 48-75  $\mu\text{m}$ .  $^1\text{H}$  NMR and  $^{13}\text{C}$  NMR spectra were recorded on Bruker-AV (400 and 100 MHz, respectively) instrument internally referenced to  $\text{SiMe}_4$  or chloroform signals. MS analyses were performed on an Agilent5975 GC-MS instrument (EI). The structures of known compounds were further corroborated by comparing their  $^1\text{H}$  NMR,  $^{13}\text{C}$  NMR data and MS data with those of literature. All reagents were used as received from commercial sources without further purification. Palladium salts and (*E*)-4-phenylbut-3-en-2-one **1a** and arylsulfonyl hydrazides **2a**, **2b**, and **2c** were purchased from Alfa-Aesar and were used as received without further purification.

### General Procedure for the preparation of substrates (**1b-1q**)<sup>[1]</sup>:

Procedure for 4-(4-methylphenyl)-3-buten-2-one (**1b**): water (4 mL) and 10 % NaOH aqueous solution (1 mL) were added under stirring to the solution of 4-methylbenzaldehyde (0.24 g, 2 mmol) in acetone (2 mL). The reaction mixture was stirred for 14 h at room temperature, then the pH value was adjusted to 7.0 with 10 % hydrochloric acid, extracted with DCM (3 x 10 mL). The combined organic layer was washed with water, dried over with anhydrous sodium sulfate, filtered and concentrated to give 0.16 g of **1b** as a yellow viscous oil, yield: 51.2 %. Similarly, other  $\alpha$ ,  $\beta$ -unsaturated carbonyl compounds (**1c-1q**) were prepared from their corresponding aldehydes.

### General procedure for the preparation of arylsulfonyl hydrazides (**2d** , **2e** , **2f**) :

Arylsulfonyl hydrazides **2d-f** were prepared according to the literature procedure.<sup>[2]</sup> Hydrazinemonohydrate (1.21 mL, 25 mmol) was added dropwise to a solution of arylsulfonyl chloride (10 mmol) in tetrahydrofuran (10 mL) under nitrogen at -30 °C. During the addition the mixture became brown and a white precipitate of hydrazine hydrochloride was deposited. The mixture was stirred at -30 °C for 30 min, added ethyl acetate (20 mL), and washed with saturated brine (5 x 15 mL). The organic layer was dried over sodium sulfate, filtered, and added slowly to stirred hexane (120 mL) over 5 min. After being stirred for 10 min, the mixture was filtered, and the collected solid was dried in vacuum. The yields for the formation of arylsulfonyl hydrazides range from 65% to 89%.

### General procedure for desulfitative conjugate addition reaction (**3a**):

A 10 mL reaction vessel was charged with Pd(acac)<sub>2</sub> (3.0 mg, 0.01 mmol), (*E*)-4-phenylbut-3-en-2-one (**1a**, 29.2 mg, 0.2 mmol), benzenesulfonylhydrazine (**2a**, 51.6 mg, 0.3 mmol) and charged with oxygen (1 atm). 1,4-Dioxane (0.6 mL) and H<sub>2</sub>O (0.2 mL) were added to the sealed reaction vessel by syringe. The resulting solution was stirred at 80 °C for 24 h. After cooling to room temperature, the volatiles were removed under vacuum and the residue was purified by column chromatography (silica gel, petroleum ether/ethyl acetate = 50:1) to give 36.3 mg **3a** as pale yellow oil; yield 81%.

### 4,4-Diphenylbutan-2-one (**3a**, CAS: 5409-60-9)<sup>3</sup>

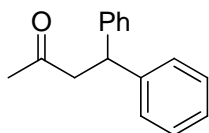

<sup>1</sup>H NMR (400 MHz, CDCl<sub>3</sub>, ppm) δ 7.29-7.27 (m, 3H), 7.23-7.16 (m, 7H), 4.59 (t, *J* = 7.6 Hz, 1H), 3.18 (d, *J* = 7.6 Hz, 2H), 2.08 (s, 3H); <sup>13</sup>C NMR (100 MHz, CDCl<sub>3</sub>, ppm) δ 206.7, 143.9, 128.6, 127.8, 126.5, 49.8, 46.2, 30.6; MS (EI) *m/z* (%) 224.1, 181, 167 (100), 103, 77.

### 4-Phenyl-4-(*p*-tolyl)butan-2-one (**3b**, CAS: 80331-24-4)<sup>3</sup>

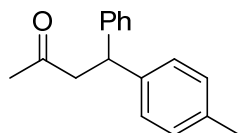

The reaction was conducted with (*E*)-4-(*p*-tolyl)but-3-en-2-one (**1b**, 32.0 mg, 0.2 mmol) and benzenesulfonylhydrazine (**2a**, 51.6 mg, 0.3 mmol). The residue was purified by column chromatography (silica gel, petroleum ether/ethyl acetate = 40:1) to give **3b** as pale yellow oil; yield 82%.

<sup>1</sup>H NMR (400 MHz, CDCl<sub>3</sub>, ppm) δ 7.28-7.26 (m, 1H), 7.24-7.07 (m, 8H), 4.54 (t, *J* = 7.6 Hz, 1H), 3.16 (d, *J* = 7.6 Hz, 2H), 2.29 (s, 3H), 2.07 (s, 3H); <sup>13</sup>C NMR (100 MHz, CDCl<sub>3</sub>, ppm) δ 207.0, 144.1, 140.8, 136.0, 129.3, 128.6, 127.6, 127.5, 126.4, 49.8, 45.7, 30.6, 21.0; MS (EI) *m/z* (%) 238.1, 195.1, 181.1(100), 165.1, 103.1, 77.

### 4-(4-Methoxyphenyl)-4-phenylbutan-2-one (**3c**, CAS: 76217-07-7)<sup>3</sup>

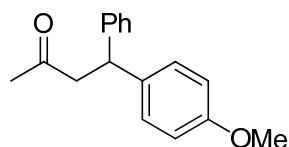

The reaction was conducted with (*E*)-4-(4-methoxyphenyl)but-3-en-2-one (**1c**, 35.2 mg, 0.2 mmol) and benzenesulfonylhydrazine (**2a**, 51.6 mg, 0.3 mmol). The residue was purified by column chromatography (silica gel, petroleum ether/ethyl acetate = 20:1) to give **3c** as pale yellow oil; yield 80%.

<sup>1</sup>H NMR (400 MHz, CDCl<sub>3</sub>, ppm) δ 7.29-7.12 (m, 7H), 6.81 (d, *J* = 8.4 Hz, 2H), 4.54 (t, *J* = 7.6 Hz, 1H), 3.76 (s, 3H), 3.15 (d, *J* = 7.6 Hz, 2H), 2.01 (s, 3H); <sup>13</sup>C NMR (100 MHz, CDCl<sub>3</sub>, ppm) δ 206.9, 158.2, 144.3, 136.1, 128.6, 128.5, 127.7, 126.4, 114.1, 55.3, 50.0, 45.4, 30.6; MS (EI) *m/z* (%) 254.1, 197.1 (100), 165.1, 103, 77.

#### 4-(4-*tert*-Butylphenyl)-4-phenylbutan-2-one (**3d**)<sup>3</sup>

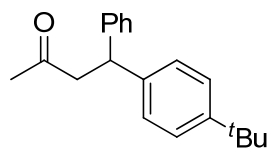

The reaction was conducted with (*E*)-4-(4-(*tert*-butyl)phenyl)-but-3-en-2-one (**1d**, 40.4 mg, 0.2 mmol) and benzenesulfonylhydrazine (**2a**, 51.6 mg, 0.3 mmol). The residue was purified by column chromatography (silica gel, petroleum ether/ethyl acetate = 40:1) to give **3d** as pale yellow oil; yield 76%.

<sup>1</sup>H NMR (400 MHz, CDCl<sub>3</sub>, ppm) δ 7.29-7.27 (m, 3H), 7.24-7.13 (m, 6H), 4.55 (t, *J* = 7.6 Hz, 1H), 3.17 (d, *J* = 7.6 Hz, 2H), 2.08 (s, 3H), 1.27 (s, 9H); <sup>13</sup>C NMR (100 MHz, CDCl<sub>3</sub>, ppm) δ 206.9, 149.2, 144.1, 140.8, 128.5, 127.8, 127.3, 126.4, 125.5, 49.9, 45.7, 34.4, 31.3, 30.5; MS (EI) *m/z* (%) 280.1, 265.1, 223.1 (100), 208.1, 165.1, 77.

#### 4-(4-(Dimethylamino)phenyl)-4-phenylbutan-2-one (**3e**)<sup>4</sup>

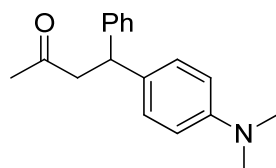

The reaction was conducted with (*E*)-4-(4-(dimethylamino)phenyl)but-3-en-2-one (**1e**, 37.8 mg, 0.2 mmol) and benzenesulfonylhydrazine (**2a**, 51.6 mg, 0.3 mmol) using CuSO<sub>4</sub> (44.8 mg, 0.28 mmol) as co-oxidant. The residue was purified by column chromatography (silica gel, petroleum ether/ethyl acetate = 10:1) to give **3e** as yellow solid; yield 75%.

<sup>1</sup>H NMR (400 MHz, CDCl<sub>3</sub>, ppm) δ 7.27-7.13 (m, 5H), 7.08 (d, *J* = 8.4 Hz, 2H), 6.65(d, *J* = 8.8 Hz, 2H), 4.48 (t, *J* = 7.6 Hz, 1H), 3.13 (d, *J* = 7.6 Hz, 2H), 2.89 (s, 6H), 2.06 (s, 3H); <sup>13</sup>C NMR (100 MHz, CDCl<sub>3</sub>, ppm) δ 207.3, 149.3, 144.7, 131.9, 128.5, 128.3, 127.6, 126.2, 112.9, 50.1, 45.4, 40.7, 30.6; MS (EI) *m/z* (%) 267.1, 210.1(100), 194.1, 165.1, 103.1, 77.

#### 4-Phenyl-4-(3,4,5-trimethoxyphenyl)butan-2-one (**3f**)

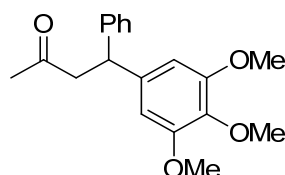

The reaction was conducted with (*E*)-4-(3,4,5-trimethoxyphenyl)but-3-en-2-one (**1f**, 47.2 mg, 0.2 mmol) and **2a** (51.6 mg, 0.3 mmol). The residue was purified by column chromatography (silica gel, petroleum ether/ethyl acetate = 30:1) to give **3f** as white solid; yield 59%.

<sup>1</sup>H NMR (400 MHz, CDCl<sub>3</sub>, ppm) δ 7.31-7.28 (m, 2H), 7.24-7.20 (m, 3H), 6.43 (s, 2H), 4.53 (t, *J* = 7.4 Hz, 1H), 3.81 (s, 6H), 3.80 (s, 3H), 3.15 (d, *J* = 7.2 Hz, 2H), 2.10 (s, 3H); <sup>13</sup>C NMR (100 MHz, CDCl<sub>3</sub>, ppm) δ 206.7, 153.3, 143.7, 139.5, 136.8, 128.6, 127.6, 126.6, 105.2, 60.8, 56.2, 49.9, 46.3, 30.6; MS (EI) *m/z* (%) 314.1, 271.1, 257.1(100), 169, 103, 77; HRMS calcd. for: C<sub>19</sub>H<sub>22</sub>NaO<sub>4</sub> [M+Na]<sup>+</sup> 337.1416, found 337.1412.

#### 4-(4-Fluorophenyl)-4-phenylbutan-2-one (**3g**)<sup>3</sup>

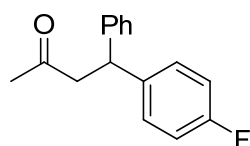

The reaction was conducted with (*E*)-4-(4-fluorophenyl)but-3-en-2-one (**1g**, 32.8 mg, 0.2 mmol) and benzenesulfonylhydrazine (**2a**, 51.6 mg, 0.3 mmol). The residue was purified by column chromatography (silica gel, petroleum ether/ethyl acetate = 30:1) to give **3g** as pale yellow oil; yield 61%.

$^1\text{H}$  NMR (400 MHz,  $\text{CDCl}_3$ , ppm)  $\delta$  7.30-7.28 (m, 2H), 7.20-7.16 (m, 5H), 6.98-6.94 (m, 2H), 4.58 (t,  $J = 7.4$  Hz, 1H), 3.16 (d,  $J = 7.2$  Hz, 2H), 2.09 (s, 3H);  $^{13}\text{C}$  NMR (100 MHz,  $\text{CDCl}_3$ , ppm)  $\delta$  206.4, 161.5 (d,  $J = 243.5$  Hz), 143.7, 139.7 (d,  $J = 3.3$  Hz), 129.2 (d,  $J = 7.8$  Hz), 128.7, 127.6, 126.6, 115.4 (d,  $J = 21.1$  Hz), 49.8, 45.3, 30.6; MS (EI)  $m/z$  (%) 242.1, 199.1, 185.1(100), 165.1, 103.1, 77.

#### 4-(4-Chlorophenyl)-4-phenylbutan-2-one (3h, CAS: 29869-86-1)<sup>3</sup>

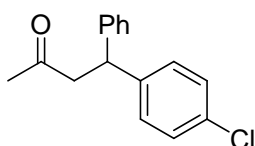

The reaction was conducted with (*E*)-4-(4-chlorophenyl)but-3-en-2-one (**1h**, 36.0 mg, 0.2 mmol) and benzenesulfonylhydrazine (**2a**, 51.6 mg, 0.3 mmol) using  $\text{CuSO}_4$  (44.8 mg, 0.28 mmol) as co-oxidant. The residue was purified by column chromatography (silica gel, petroleum ether/ethyl acetate = 30:1) to give **3h** as pale yellow oil; yield 62%.

$^1\text{H}$  NMR (400 MHz,  $\text{CDCl}_3$ , ppm)  $\delta$  7.30-7.28 (m, 2H), 7.23-7.14 (m, 7H), 4.57 (t,  $J = 7.4$  Hz, 1H), 3.16 (d,  $J = 7.6$  Hz, 2H), 2.09 (s, 3H);  $^{13}\text{C}$  NMR (100 MHz,  $\text{CDCl}_3$ , ppm)  $\delta$  206.3, 143.4, 142.5, 132.3, 129.1, 128.7, 127.6, 126.7, 49.6, 45.4, 30.6; MS (EI)  $m/z$  (%) 258.1, 223.1(100), 201., 165.1, 103, 77.

#### 4-(4-Bromophenyl)-4-phenylbutan-2-one (3i, CAS: 1005497-31-3)<sup>3</sup>

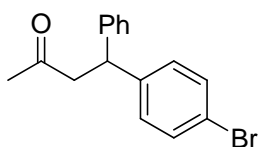

The reaction was conducted with (*E*)-4-(4-bromophenyl)but-3-en-2-one (**1i**, 44.8 mg, 0.2 mmol) and benzenesulfonylhydrazine (**2a**, 51.6 mg, 0.3 mmol) using  $\text{CuSO}_4$  (44.8 mg, 0.28 mmol) as co-oxidant. The residue was purified by column chromatography (silica gel, petroleum ether/ethyl acetate = 30:1) to give **3i** as pale yellow oil; yield 63%.

$^1\text{H}$  NMR (400 MHz,  $\text{CDCl}_3$ , ppm)  $\delta$  7.39 (d,  $J = 8.4$  Hz, 2H), 7.30-7.28 (m, 2H), 7.19-7.17 (m, 3H), 7.09 (d,  $J = 8.4$  Hz, 2H), 4.55 (t,  $J = 7.4$  Hz, 1H), 3.15 (d,  $J = 7.2$  Hz, 2H), 2.09 (s, 3H);  $^{13}\text{C}$

NMR (100 MHz, CDCl<sub>3</sub>, ppm)  $\delta$  206.4, 143.3, 143.0, 131.7, 129.5, 128.7, 127.7, 126.7, 120.3, 49.5, 45.4, 30.7; MS (EI)  $m/z$  (%) 302, 245, 178.1, 165.1 (100), 103, 77.

#### 4-Phenyl-4-(*m*-tolyl)butan-2-one (**3j**)

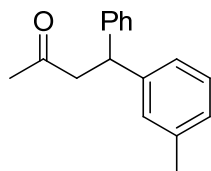

The reaction was conducted with (*E*)-4-(*m*-tolyl)but-3-en-2-one (**1j**, 32.0 mg, 0.2 mmol) and benzenesulfonylhydrazine (**2a**, 51.6 mg, 0.3 mmol). The residue was purified by column chromatography (silica gel, petroleum ether/ethyl acetate = 40:1) to give **3j** as pale yellow oil; yield 80%.

<sup>1</sup>H NMR (400 MHz, CDCl<sub>3</sub>, ppm)  $\delta$  7.29-7.14 (m, 6H), 7.03-6.98 (m, 3H), 4.54 (t,  $J$  = 7.4 Hz, 1H), 3.17 (d,  $J$  = 7.6 Hz, 2H), 2.30 (s, 3H), 2.08 (s, 3H); <sup>13</sup>C NMR (100 MHz, CDCl<sub>3</sub>, ppm)  $\delta$  206.9, 144.0, 143.8, 138.2, 128.6, 128.5, 128.4, 127.7, 127.3, 126.4, 124.6, 49.8, 46.1, 30.6, 21.5 ; MS (EI)  $m/z$  (%) 238.1, 195.1, 181.1(100), 165.1, 103.1, 77; HRMS calcd. for: C<sub>17</sub>H<sub>18</sub>NaO [M+Na]<sup>+</sup> 261.1256, found 261.1249.

#### 4-(3-Methoxyphenyl)-4-phenylbutan-2-one (**3k**)<sup>5</sup>

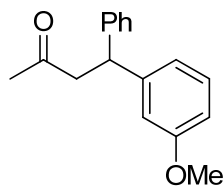

The reaction was conducted with (*E*)-4-(3-methoxyphenyl)but-3-en-2-one (**1k**, 35.2 mg, 0.2 mmol), benzenesulfonylhydrazine (**2a**, 51.6 mg, 0.3 mmol). The residue was purified by column chromatography (silica gel, petroleum ether/ethyl acetate = 40:1) to give **3k** as white oil; yield 80%.

<sup>1</sup>H NMR (400 MHz, CDCl<sub>3</sub>, ppm)  $\delta$  7.29–7.15 (m, 6H), 6.83-6.71 (m, 3H), 4.55 (t,  $J$  = 7.4 Hz, 1H), 3.76 (s, 3H), 3.16 (d,  $J$  = 7.6 Hz, 2H), 2.08 (s, 3H); <sup>13</sup>C NMR (100 MHz, CDCl<sub>3</sub>, ppm)  $\delta$  206.8, 159.8, 145.5, 143.8, 129.6, 128.6, 127.7, 126.5, 120.1, 114.0, 111.4, 55.2, 49.7, 46.1, 30.7; MS (EI)  $m/z$  (%) 254.2, 211.2, 165.1, 103.1 (100), 77.1.

#### 4-(2-Methoxyphenyl)-4-phenylbutan-2-one (**3l**)<sup>6</sup>

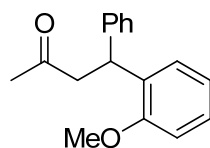

The reaction was conducted with (*E*)-4-(2-methoxyphenyl)but-3-en-2-one (**1l**, 35.2 mg, 0.2 mmol), benzenesulfonylhydrazine (**2a**, 51.6 mg, 0.3 mmol). The residue was purified by column chromatography (silica gel, petroleum ether/ethyl acetate = 40:1) to give **3l** as white solid; yield 78%.

<sup>1</sup>H NMR (400 MHz, CDCl<sub>3</sub>, ppm) δ 7.25–7.09 (m, 7H), 6.89–6.82 (m, 2H), 4.98 (t, *J* = 7.6 Hz, 1H), 3.79 (s, 3H), 3.15–3.13 (m, 2H), 2.09 (s, 3H); <sup>13</sup>C NMR (100 MHz, CDCl<sub>3</sub>, ppm) δ 207.3, 156.8, 143.5, 132.3, 128.4, 128.0, 127.9, 127.6, 126.2, 120.6, 110.9, 55.5, 49.0, 39.6, 30.2; MS (EI) *m/z* (%) 254.1, 197.1, 165.1, 91.1 (100), 77.1.

#### 4-(2-Fluorophenyl)-4-phenylbutan-2-one (**3m**)

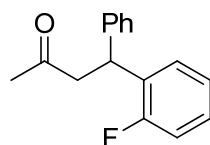

The reaction was conducted with CuSO<sub>4</sub> (44.8 mg, 0.28 mmol), (*E*)-4-(2-fluorophenyl)but-3-en-2-one (**1m**, 32.8 mg, 0.2 mmol), benzenesulfonylhydrazine (**2a**, 51.6 mg, 0.3 mmol). The residue was purified by column chromatography (silica gel, petroleum ether/ethyl acetate = 40:1) to give **3m** as white solid; yield 53%.

<sup>1</sup>H NMR (400 MHz, CDCl<sub>3</sub>, ppm) δ 7.29–7.28 (m, 2H), 7.24–7.15 (m, 5H), 7.08–6.97 (m, 2H), 4.86 (t, *J* = 7.6 Hz, 1H), 3.21 (d, *J* = 7.6 Hz, 2H), 2.11 (s, 3H); <sup>13</sup>C NMR (100 MHz, CDCl<sub>3</sub>, ppm) δ 206.2, 160.6 (d, *J* = 244.5 Hz), 142.6, 130.8 (d, *J* = 14 Hz), 128.9 (d, *J* = 4.4 Hz), 128.6, 128.2 (d, *J* = 8.3 Hz), 127.7 (d, *J* = 0.8 Hz), 126.6, 124.2 (d, *J* = 3.6 Hz), 115.8 (d, *J* = 22.4 Hz), 48.6 (d, *J* = 1.6 Hz), 39.8 (d, *J* = 2 Hz), 30.2; MS (EI) *m/z* (%) 242.1, 199.1, 185.1 (100), 165.1, 121.0, 77.1; HRMS calcd. for: C<sub>16</sub>H<sub>15</sub>FN<sub>2</sub>O [M+Na]<sup>+</sup> 265.1005, found 265.1002.

#### 4-(2-Chlorophenyl)-4-phenylbutan-2-one (**3n**)

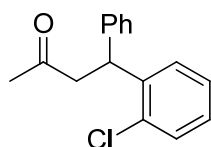

The reaction was conducted with (*E*)-4-(2-chlorophenyl)but-3-en-2-one (**1n**, 36.0 mg, 0.2 mmol) and benzenesulfonylhydrazine (**2a**, 51.6 mg, 0.3 mmol). The residue was purified by column chromatography (silica gel, petroleum ether/ethyl acetate = 30:1) to give **3n** as pale yellow oil; yield 60%.

$^1\text{H}$  NMR (400 MHz,  $\text{CDCl}_3$ , ppm)  $\delta$  7.36–7.28 (m, 2H), 7.24–7.13 (m, 7H), 5.09 (t,  $J = 7.6$  Hz, 1H), 3.18–3.14 (m, 2H), 2.12 (s, 3H);  $^{13}\text{C}$  NMR (100 MHz,  $\text{CDCl}_3$ , ppm)  $\delta$  206.2, 142.2, 141.1, 134.0, 130.0, 128.6, 128.5, 128.0, 127.8, 127.0, 126.6, 49.1, 42.4, 30.1; MS (EI)  $m/z$  (%) 258.1, 223.1(100), 201., 165.1, 103, 77; HRMS calcd. for:  $\text{C}_{16}\text{H}_{15}\text{ClNaO}$   $[\text{M}+\text{Na}]^+$  281.0708, found 281.0712.

### 1,3,3-Triphenylpropan-1-one (**3o**, CAS: 606-86-0)<sup>7</sup>

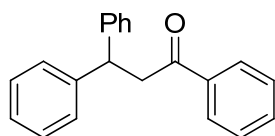

The reaction was conducted with (*E*)-chalcone (**1o**, 41.6 mg, 0.2 mmol) and benzenesulfonylhydrazine (**2a**, 51.6 mg, 0.3 mmol). The residue was purified by column chromatography (silica gel, petroleum ether/ethyl acetate =50:1) to give **3o** as white solid; yield 80%.

$^1\text{H}$  NMR (400 MHz,  $\text{CDCl}_3$ , ppm)  $\delta$  7.93 (d,  $J = 7.6$  Hz, 2H), 7.55–7.53 (m, 1H), 7.46–7.42 (m, 2H), 7.27–7.26 (m, 8H), 7.19–7.16 (m, 2H), 4.83 (t,  $J = 7.2$  Hz, 1H), 3.74 (d,  $J = 7.2$  Hz, 2H);  $^{13}\text{C}$  NMR (100 MHz,  $\text{CDCl}_3$ , ppm)  $\delta$  198.0, 144.2, 137.2, 133.0, 128.6, 128.5, 128.1, 127.9, 126.4, 46.1, 44.8; MS (EI)  $m/z$  (%) 286.1, 167.1, 152.1, 105.0 (100), 77.

### 3,3-Diphenyl-1-(p-tolyl)propan-1-one (**3p**, CAS: 37620-42-1)<sup>7</sup>

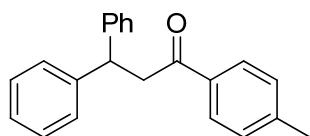

The reaction was conducted with (*E*)-3-phenyl-1-(*p*-tolyl)prop-2-en-1-one (**1p**, 44.4 mg, 0.2 mmol) and benzenesulfonylhydrazine (**2a**, 51.6 mg, 0.3 mmol). The residue was purified by column chromatography (silica gel, petroleum ether/ethyl acetate =50:1) to give **3p** as white solid; yield 81%.

<sup>1</sup>H NMR (400 MHz, CDCl<sub>3</sub>, ppm) δ 7.84 (d, *J* = 8.0 Hz, 2H), 7.27-7.15 (m, 12H), 4.82 (t, *J* = 7.2 Hz, 1H), 3.71 (d, *J* = 7.2 Hz, 2H), 2.40 (s, 3H); <sup>13</sup>C NMR (100 MHz, CDCl<sub>3</sub>, ppm) δ 197.6, 144.3, 143.8, 134.8, 129.3, 128.5, 128.2, 127.9, 126.3, 46.1, 44.7, 21.6; MS (EI) *m/z* (%) 300.1, 167.1, 152.0, 119.1(100), 91.1.

#### 1-(4-Methoxyphenyl)-3,3-diphenylpropan-1-one (**3q**, CAS: 2657-24-1)<sup>7</sup>

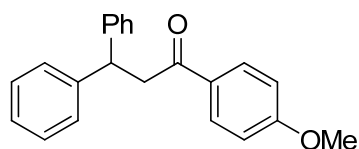

The reaction was conducted with (*E*)-1-(4-methoxyphenyl)-3-phenylprop-2-en-1-one (**1q**, 47.6 mg, 0.2 mmol) and benzenesulfonylhydrazine (**2a**, 51.6 mg, 0.3 mmol) under oxygen (1 atm) for 32 h. The residue was purified by column chromatography (silica gel, petroleum ether/ethyl acetate =20:1) to give **3q** as white solid; yield 81%.

<sup>1</sup>H NMR (400 MHz, CDCl<sub>3</sub>, ppm) δ 7.93 (d, *J* = 8.0 Hz, 2H), 7.27-7.17 (m, 10H), 6.91 (d, *J* = 8.4 Hz, 2H), 4.82 (t, *J* = 7.0 Hz, 1H), 3.86 (s, 3H), 3.69 (d, *J* = 6.8 Hz, 2H); <sup>13</sup>C NMR (100 MHz, CDCl<sub>3</sub>, ppm) δ 196.5, 163.5, 144.4, 130.4, 130.2, 128.5, 127.9, 126.3, 113.8, 55.5, 46.2, 44.4; MS (EI) *m/z* (%) 316.2, 239.2, 167.1, 135.1(100), 77.1.

#### 1-(4-Fluorophenyl)-3,3-diphenylpropan-1-one (**3r**, CAS: 67800-16-2)<sup>7</sup>

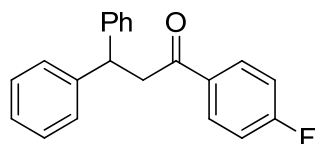

The reaction was conducted with (*E*)-1-(4-fluorophenyl)-3-phenylprop-2-en-1-one (**1r**, 45.2 mg, 0.2 mmol) and benzenesulfonylhydrazine (**2a**, 51.6 mg, 0.3 mmol) under oxygen (1 atm) for 32 h. The residue was purified by column chromatography (silica gel, petroleum ether/ethyl acetate =50:1) to give **3r** as white solid; yield 82%.

$^1\text{H}$  NMR (400 MHz,  $\text{CDCl}_3$ , ppm)  $\delta$  7.97-7.94 (m, 2H), 7.26-7.18(m, 10H), 7.13-7.08 (m, 2H), 4.81 (t,  $J$  = 7.2 Hz, 1H), 3.71 (d,  $J$  = 7.2 Hz, 2H);  $^{13}\text{C}$  NMR (100 MHz,  $\text{CDCl}_3$ , ppm)  $\delta$  196.5, 165.8 (d,  $J$  = 253.3 Hz), 144.1, 133.6 (d,  $J$  = 2.7 Hz), 130.7 (d,  $J$  = 9.3 Hz), 128.6, 127.9, 126.5, 115.7 (d,  $J$  = 21.8 Hz), 46.1, 44.7; MS (EI)  $m/z$  (%) 304.1, 286.1, 167.1, 123(100), 95.

**4-Phenyl-4-(p-tolyl)butan-2-one (3s, CAS: 80331-24-4)<sup>3</sup>**

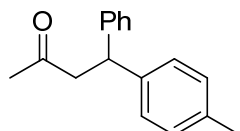

The reaction was conducted with **1a** (29.2 mg, 0.2 mmol) and 4-methylbenzenesulfonylhydrazide (**2b**, 55.8 mg, 0.3 mmol) under oxygen (1 atm) for 24 h. The residue was purified by column chromatography (silica gel, petroleum ether/ethyl acetate = 40:1) to give **3s** as pale yellow oil; yield 87%. This product is same as **3b**.

**4-(4-Methoxyphenyl)-4-phenylbutan-2-one (3t, CAS: 76217-07-7)<sup>3</sup>**

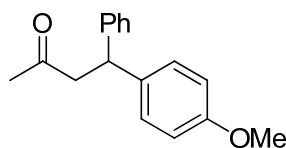

The reaction was conducted with **1a** (29.2 mg, 0.2 mmol) and 4-methoxybenzenesulfonylhydrazide (**2c**, 60.6 mg, 0.3 mmol) under oxygen (1 atm) for 24 h. The residue was purified by column chromatography (silica gel, petroleum ether/ethyl acetate = 20:1) to give **3t** as pale yellow oil; yield 85%. This product is same as **3c**.

**4-(4-tert-Butylphenyl)-4-phenylbutan-2-one (3u)<sup>3</sup>**

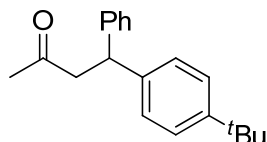

The reaction was conducted with **1a** (29.2 mg, 0.2 mmol) and 4-(tert-butyl)benzenesulfonylhydrazide (**2d**, 68.4 mg, 0.3 mmol) using  $\text{CuSO}_4$  (44.8 mg, 0.28

mmol) as co-oxidant. The residue was purified by column chromatography (silica gel, petroleum ether/ethyl acetate = 40:1) to give **3u** as pale yellow oil; yield 80%. This product is same as **3d**.

#### 4-(4-Fluorophenyl)-4-phenylbutan-2-one (**3v**)<sup>3</sup>

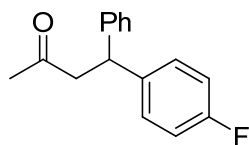

The reaction was conducted with **1a** (29.2 mg, 0.2 mmol) and 4-fluorobenzenesulfonohydrazide (**2e**, 57.0 mg, 0.3 mmol). The residue was purified by column chromatography (silica gel, petroleum ether/ethyl acetate = 30:1) to give **3v** as pale yellow oil; yield 88%. This product is same as **3g**.

#### 4-(Naphthalen-2-yl)-4-phenylbutan-2-one (**3w**)<sup>3</sup>

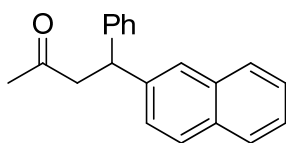

The reaction was conducted with **1a** (29.2 mg, 0.2 mmol) and naphthalene-2-sulfonohydrazide (**2f**, 66.6 mg, 0.3mmol) using CuSO<sub>4</sub> (44.8 mg, 0.28 mmol) as co-oxidant. The residue was purified by column chromatography (silica gel, petroleum ether/ethyl acetate =50:1) to give **3w** as white solid; yield 88%.

<sup>1</sup>H NMR (400 MHz, CDCl<sub>3</sub>, ppm) δ 7.78-7.68 (m, 4H), 7.46-7.42 (m, 2H), 7.33-7.19 (m, 6H), 4.76 (t, *J* = 7.2 Hz, 1H), 3.34-3.23 (m, 2H), 2.11 (s, 3H); <sup>13</sup>C NMR (100 MHz, CDCl<sub>3</sub>, ppm) δ 206.7, 143.7, 141.3, 133.5, 132.3, 128.9, 128.6, 128.3, 127.9, 127.8, 127.6, 126.6, 126.1, 125.8, 125.6, 49.6, 46.2, 30.7; MS (EI) *m/z* (%) 274.1, 217.1 (100), 202.1, 153.1, 103.1.

## Reference

1. Zhu, L.; Wang, W.; Huang, H.; etc. Patent, EP1783115, **2007**.
2. Myers, A. G.; Zheng, B.; Mohammad, M. *J. Org. Chem.* **1997**, *62*, 7507.
3. Chen, W.; Zhou, X.; Xiao, F.; Luo, J.; Deng, G - J. *Tetrahedron Lett.* **2012**, *53*, 4347.
4. Marsocci, S. F.; MacKeneie, S. *J. Am. Chem. Soc.* **1959**, *81*, 4513.
5. Nishikata, T.; Yamamoto, Y.; Miyaura, N. *Adv. Synth. Catal.* **2007**, *349*, 1759.
6. Huang, S.; Wu, T.; Tsai, F. *Appl. Organometallic Chem.* **2010**, *24*, 619.
7. Song, C.; Cai, G.; Jiang, Z.; Li, H.; Gan, L.; Shi, Z.; Farrell, T. R. *Chem. Commun.* **2009**, *40*, 6002.

# <sup>1</sup>H NMR and <sup>13</sup>C NMR spectra

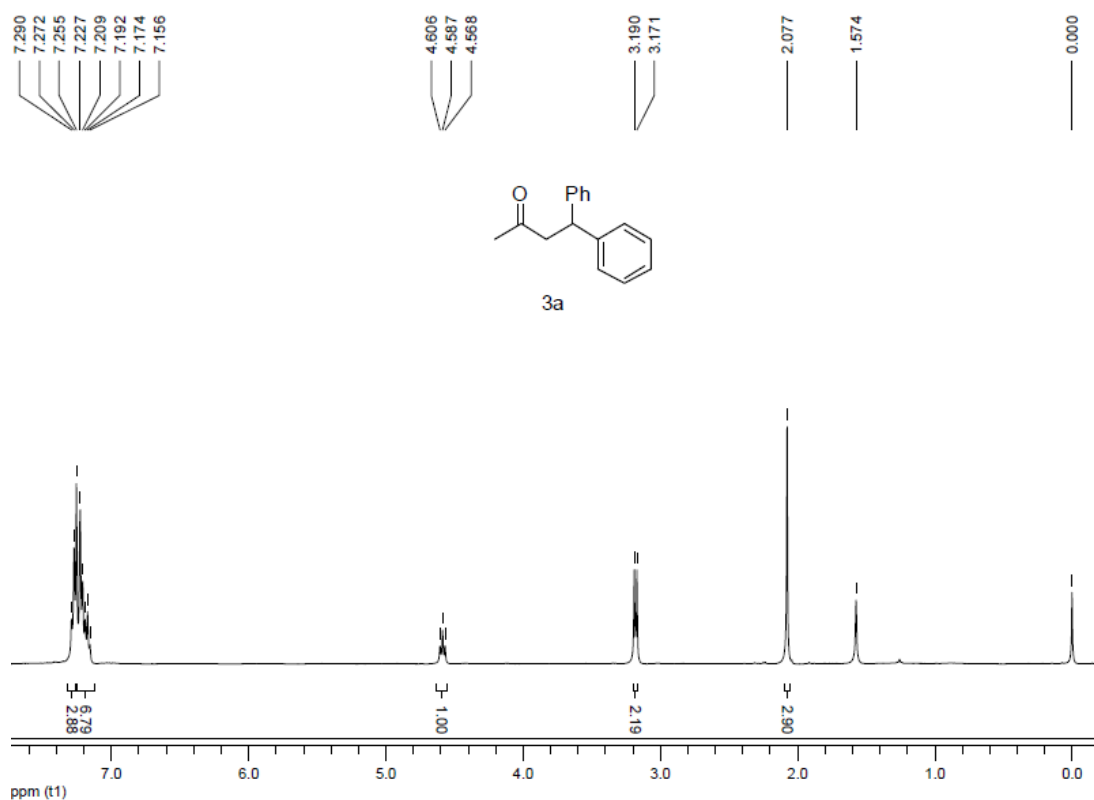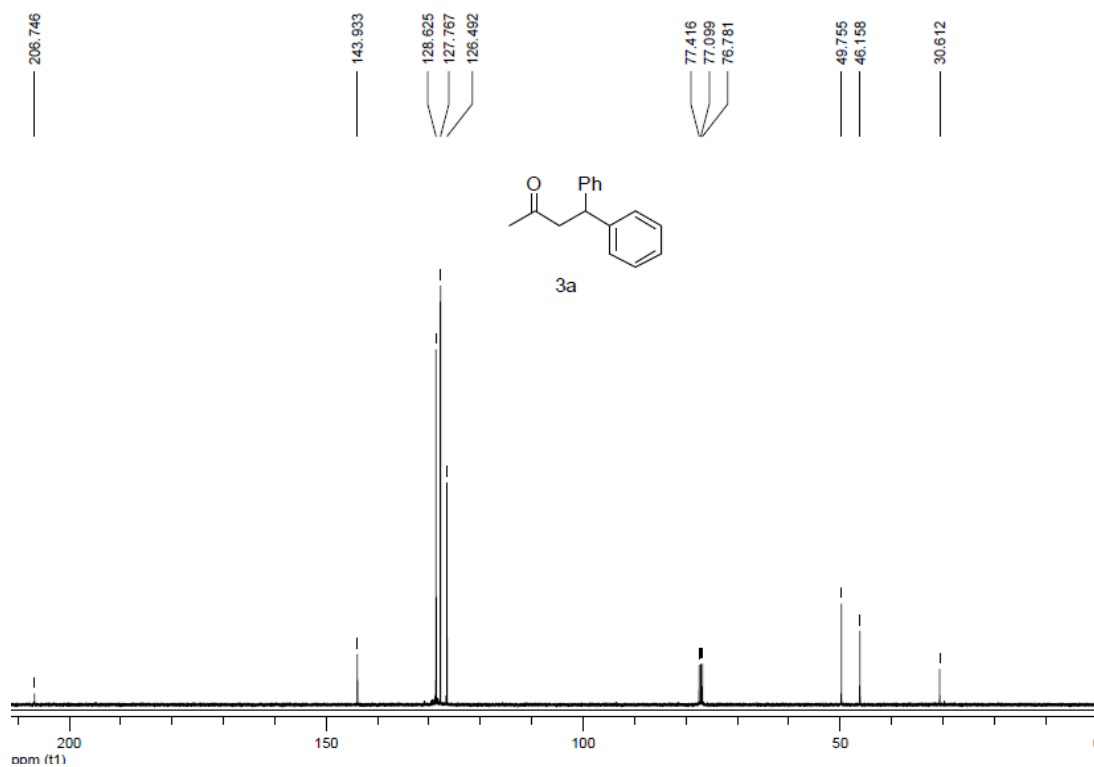

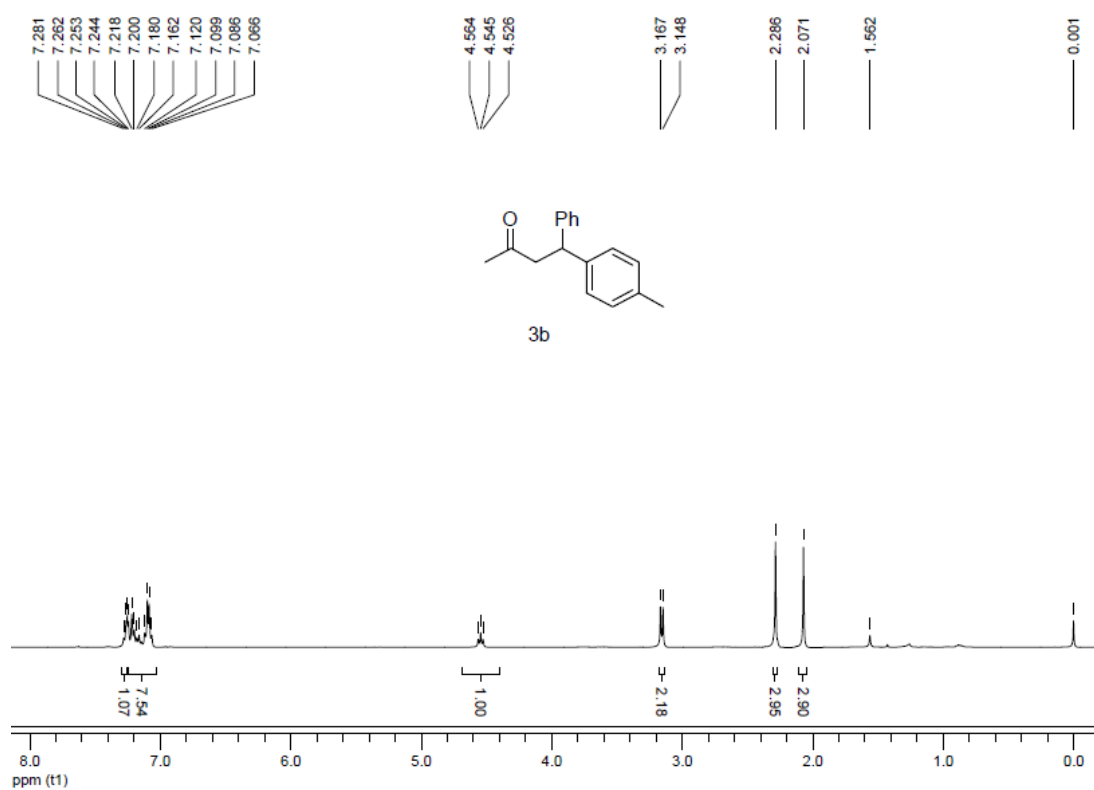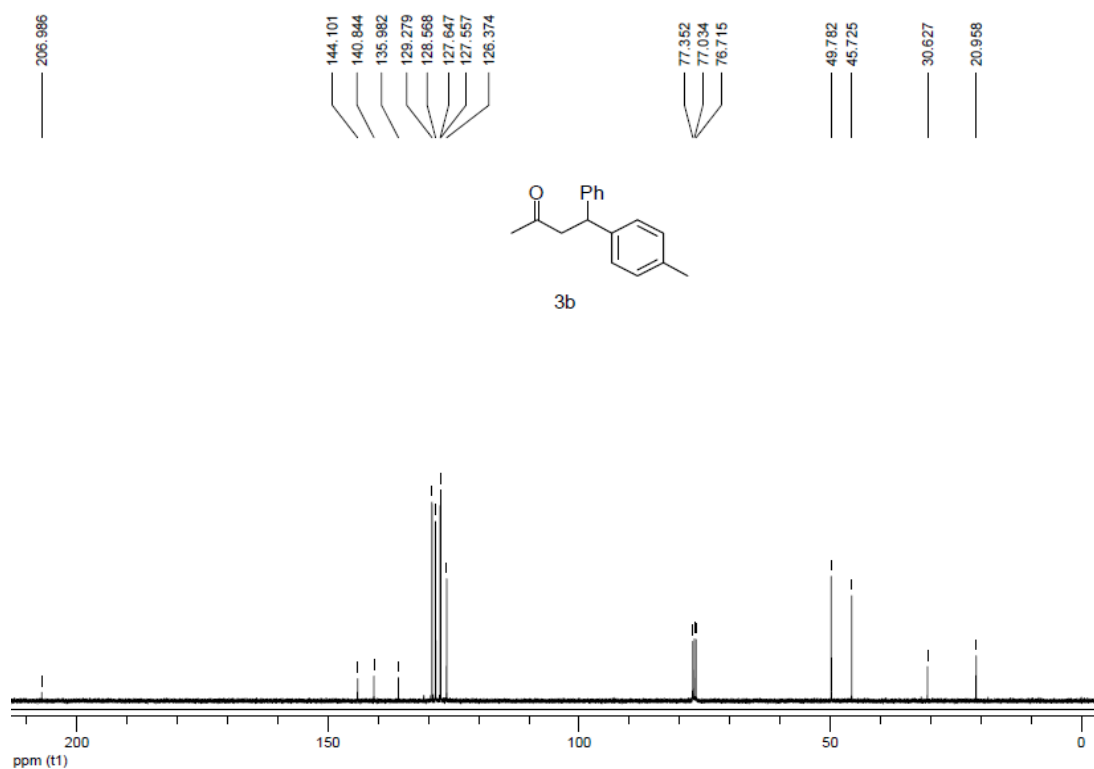

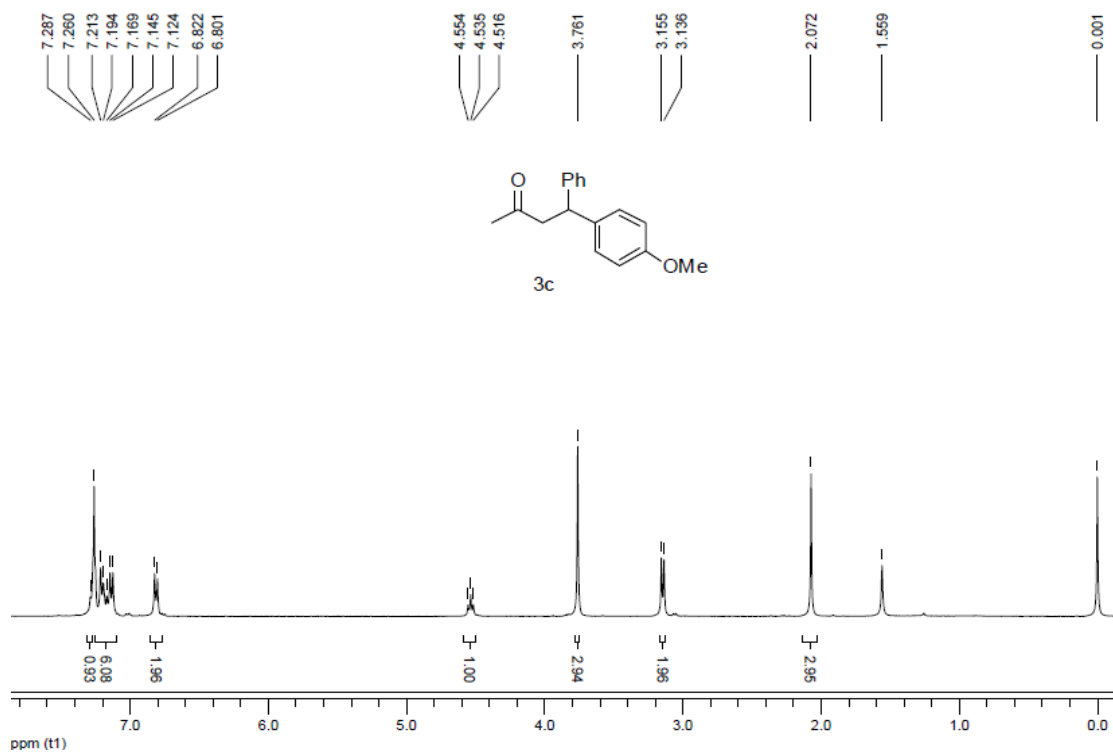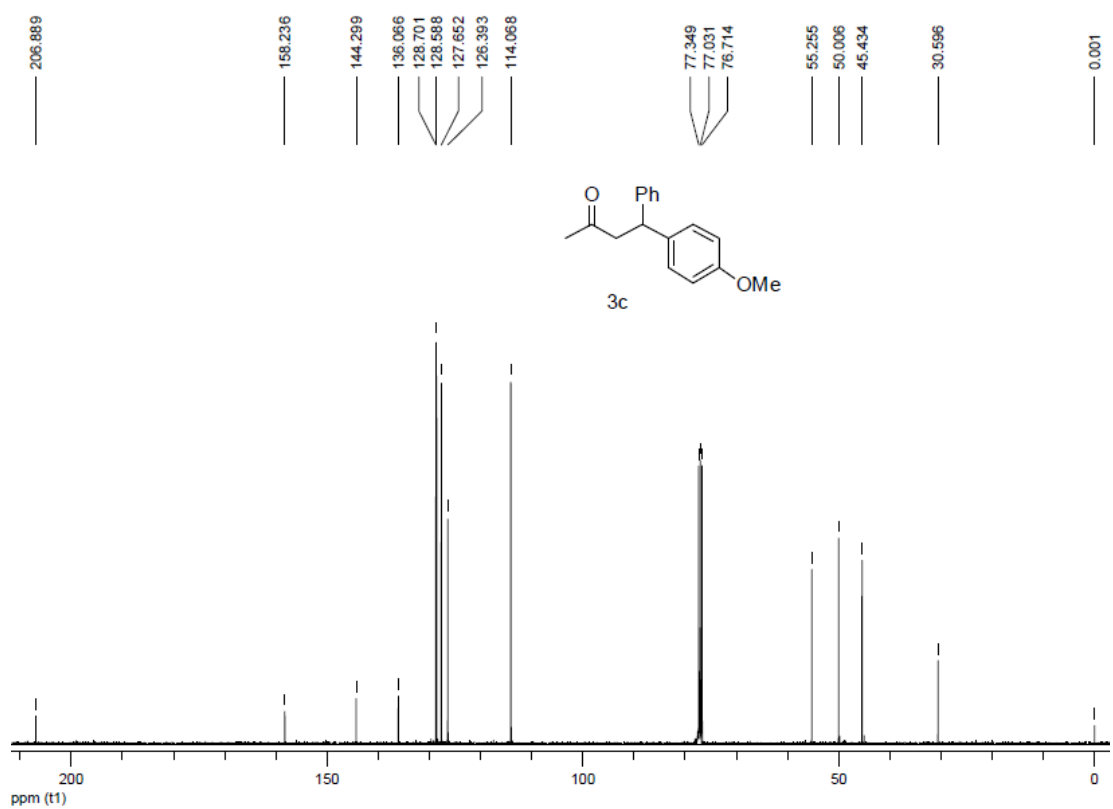

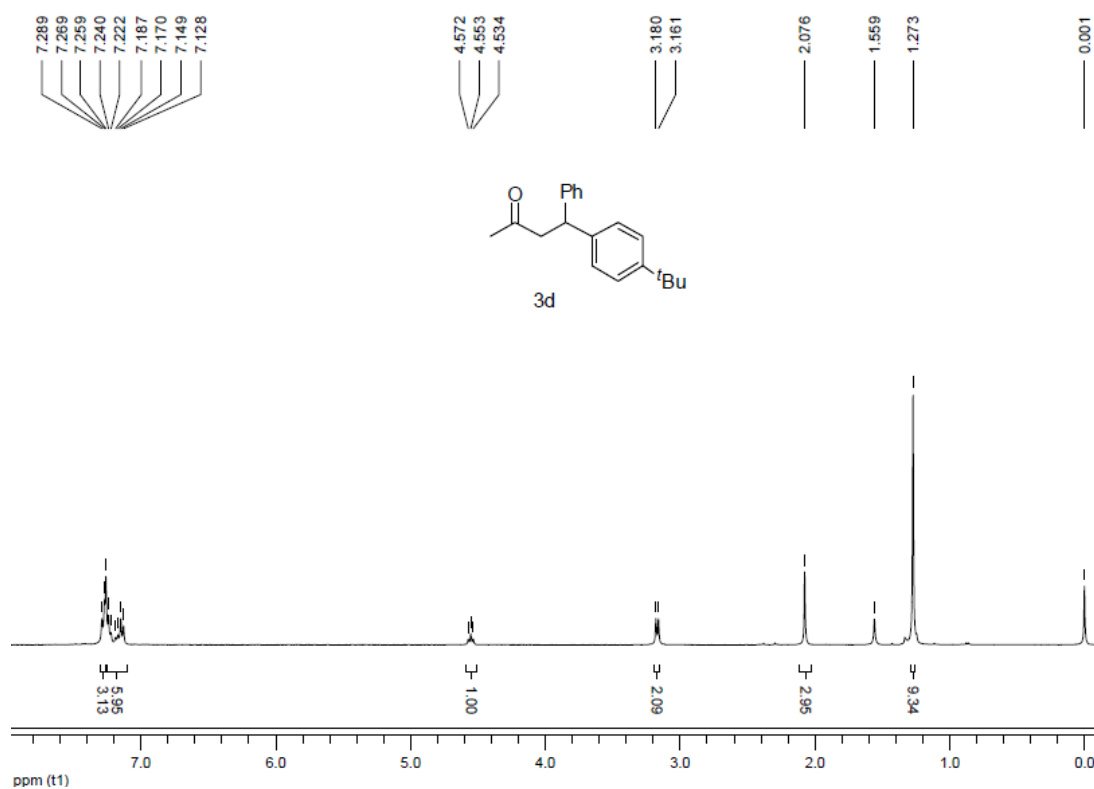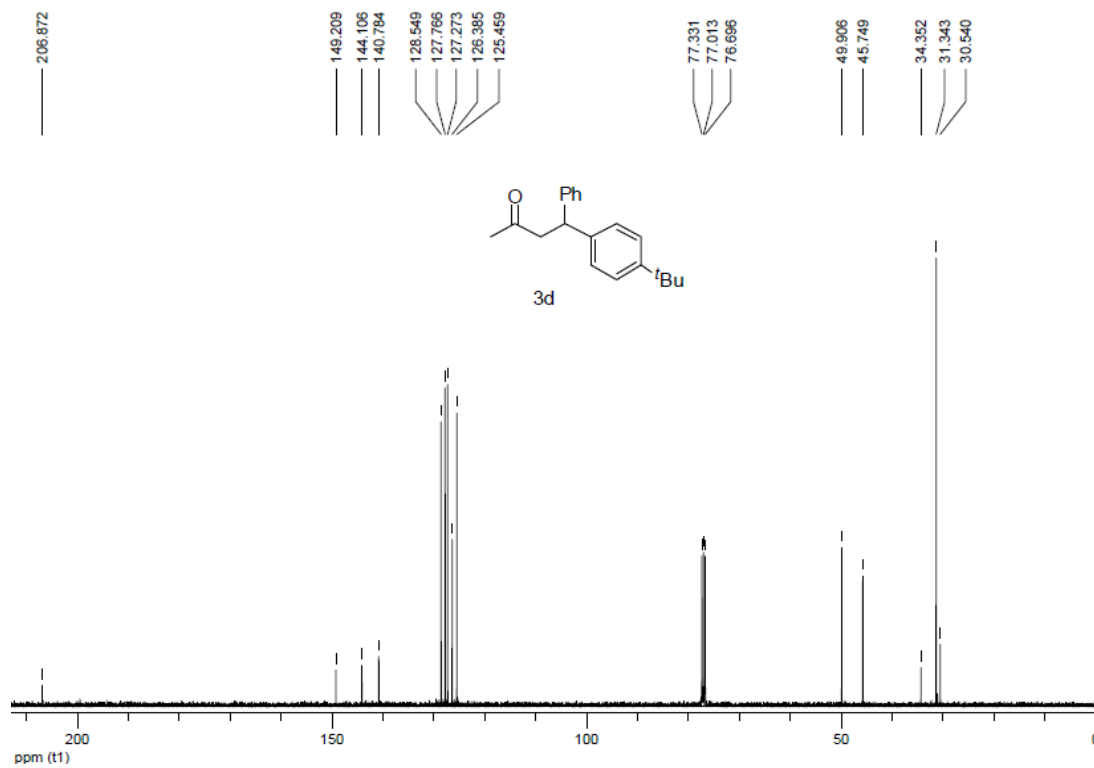

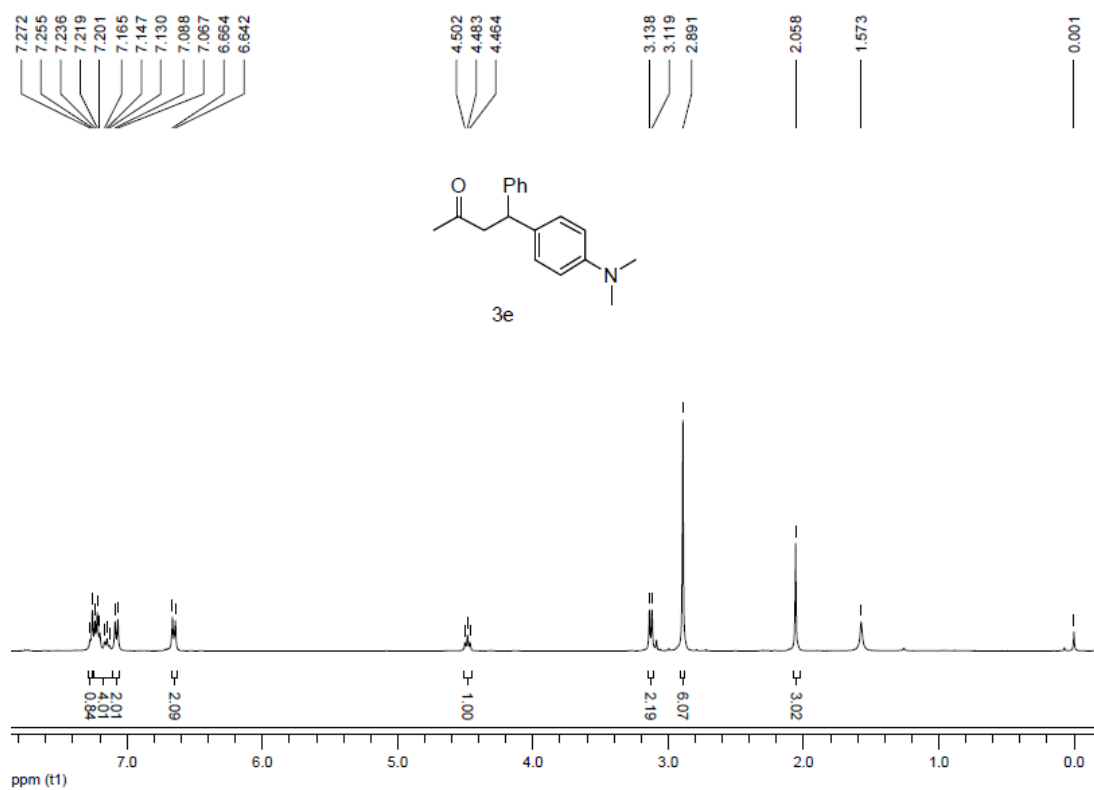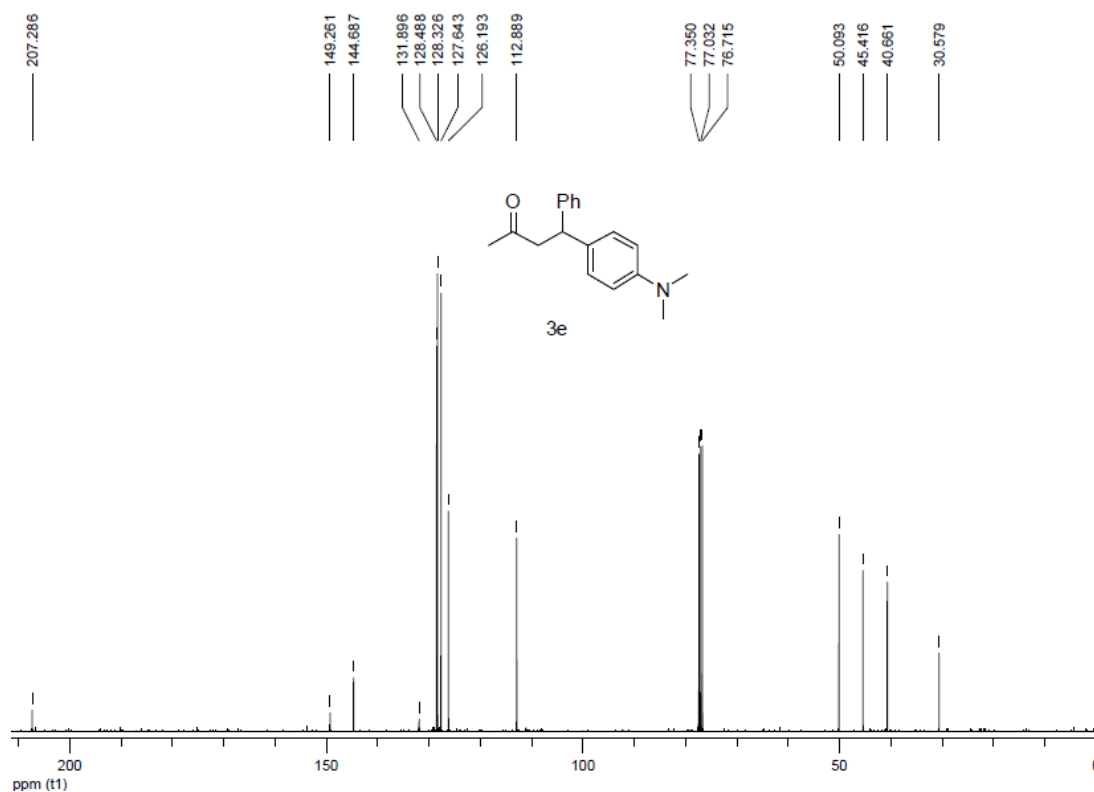

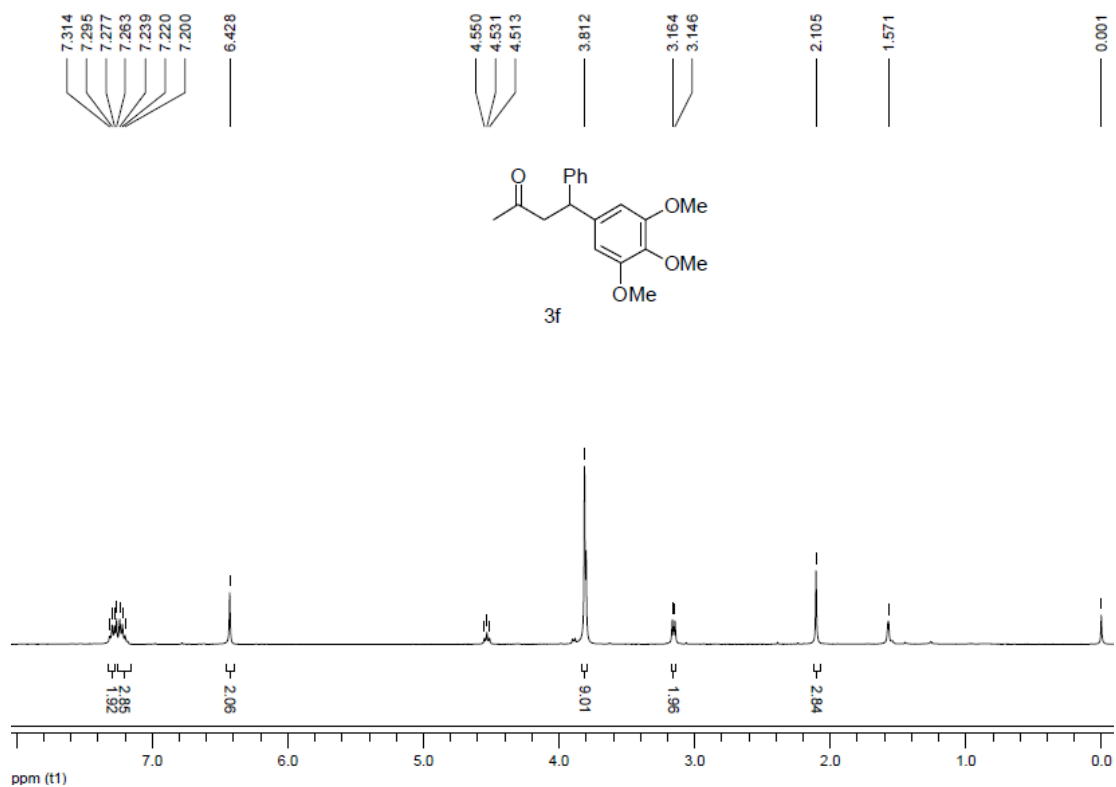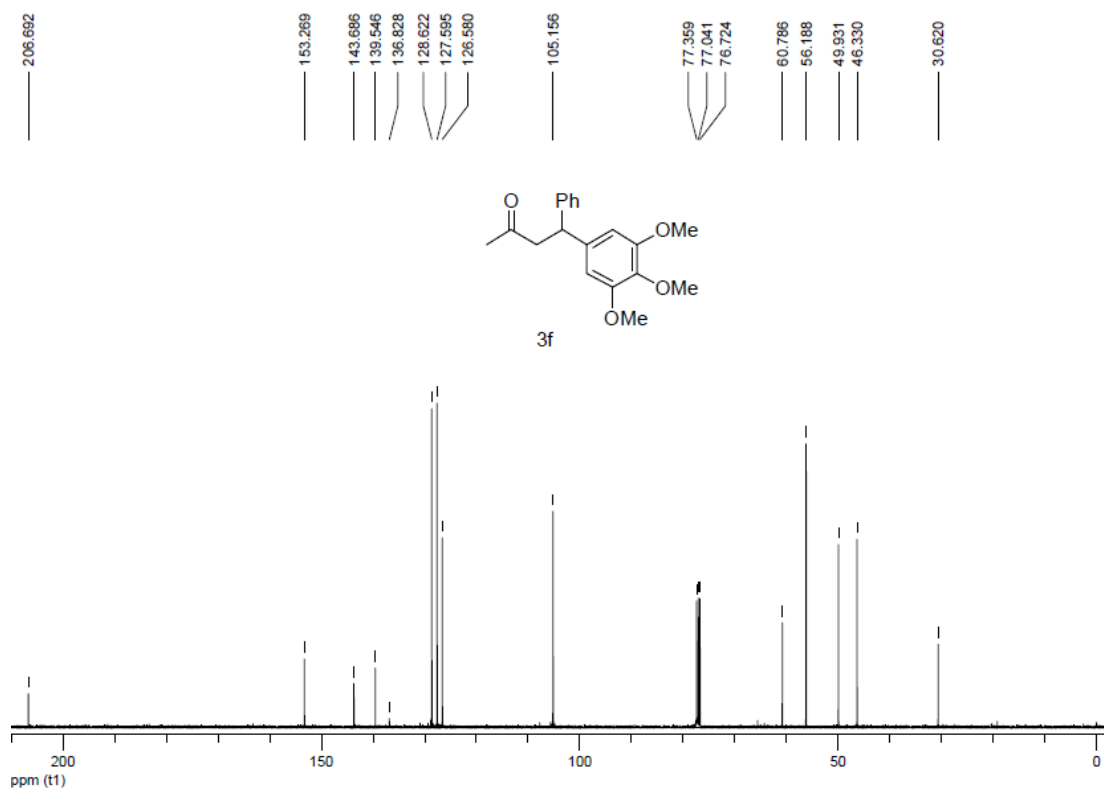

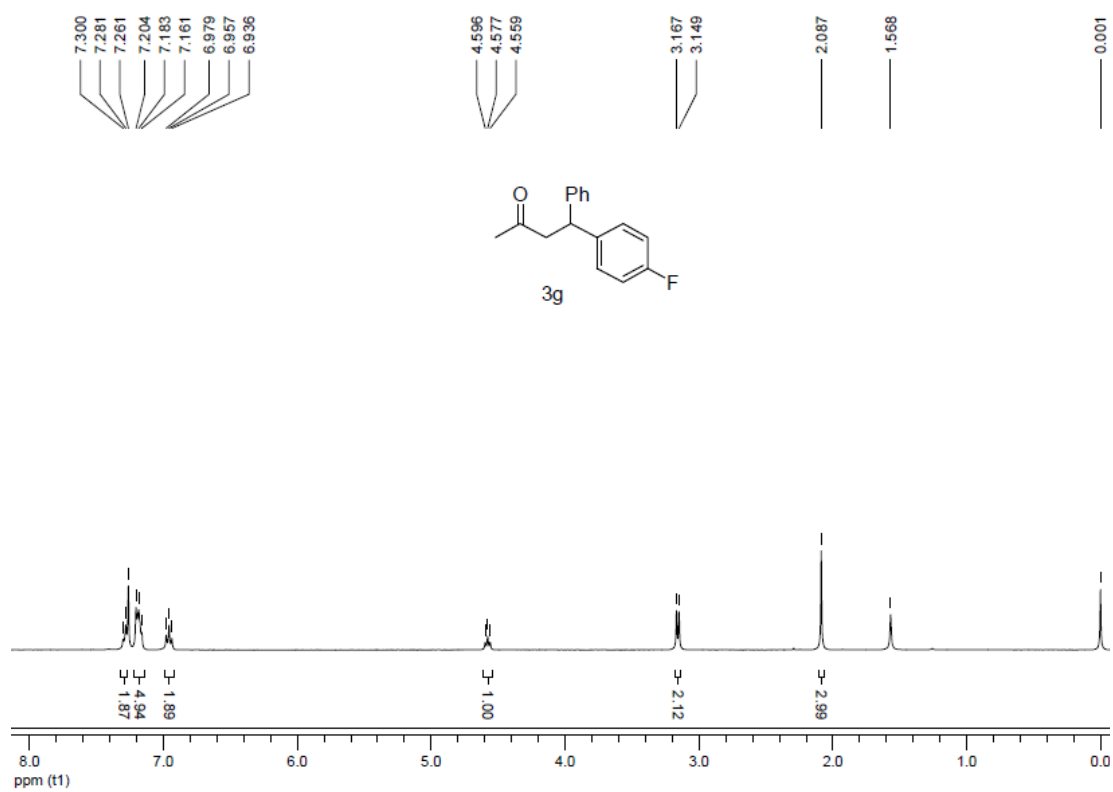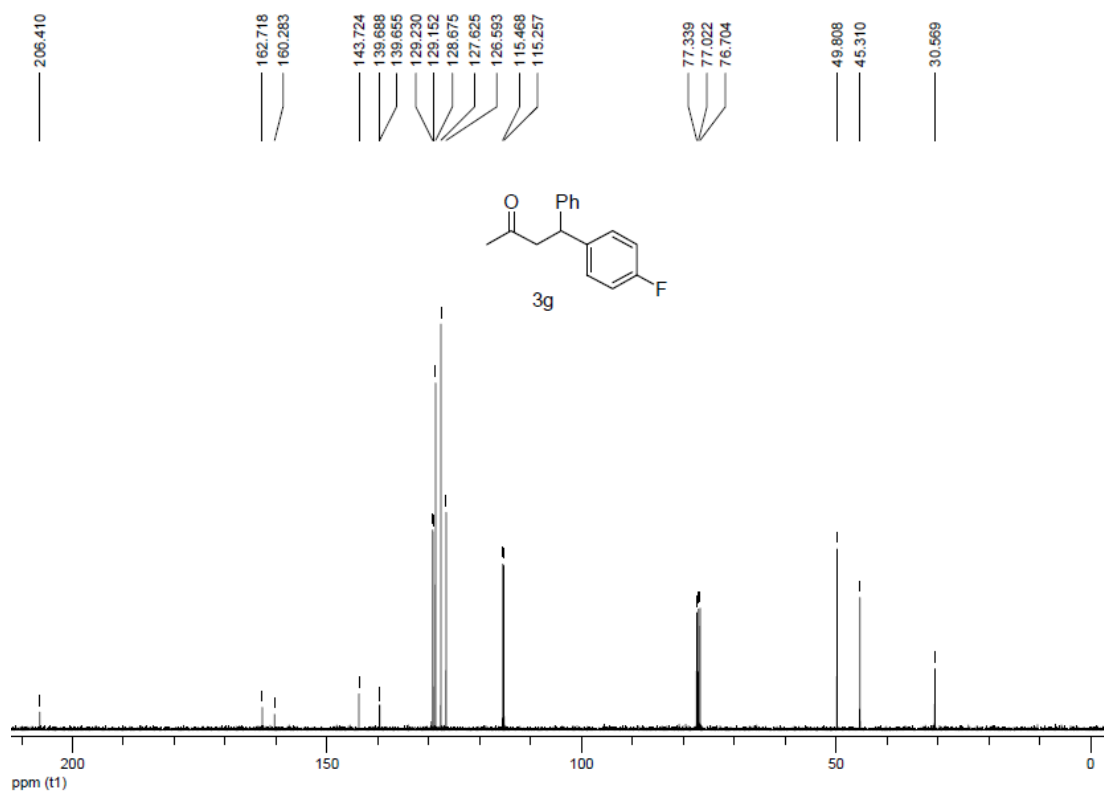

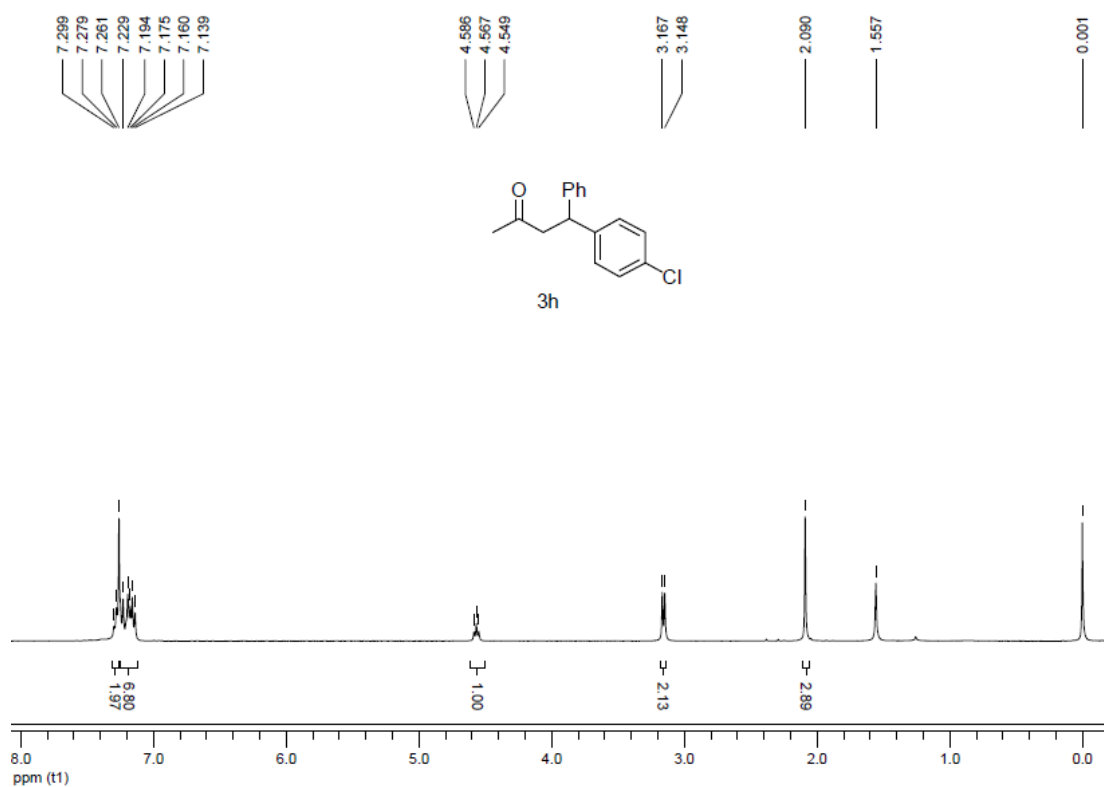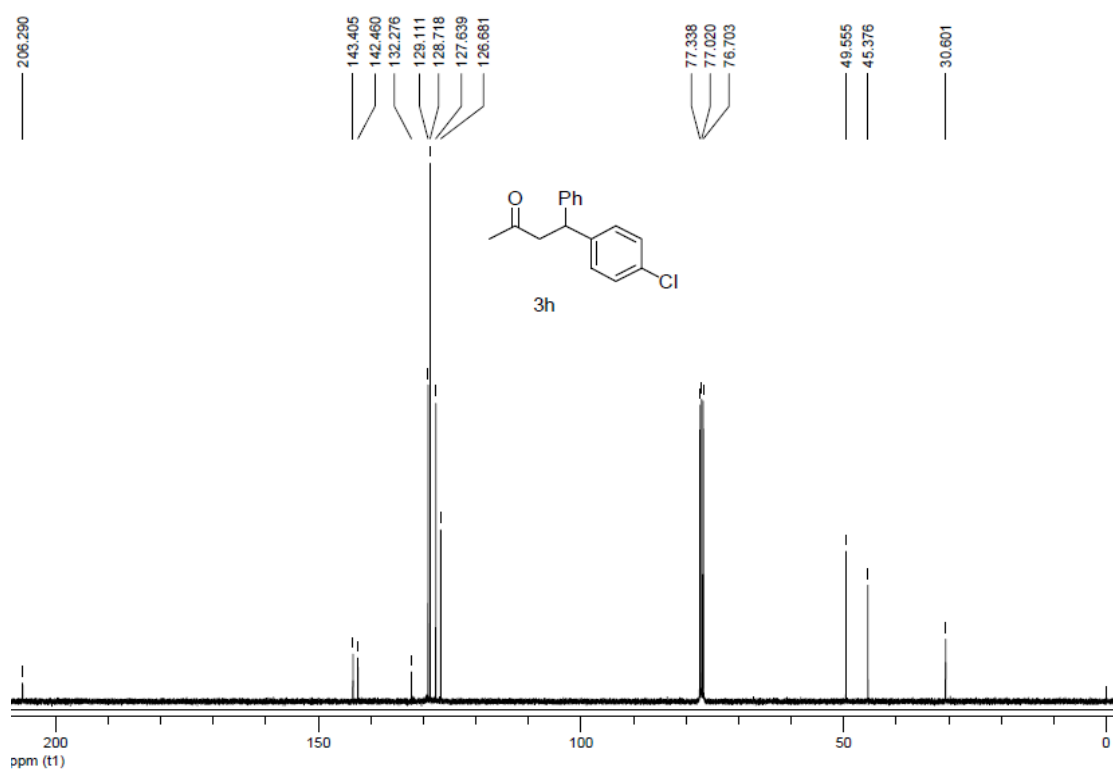

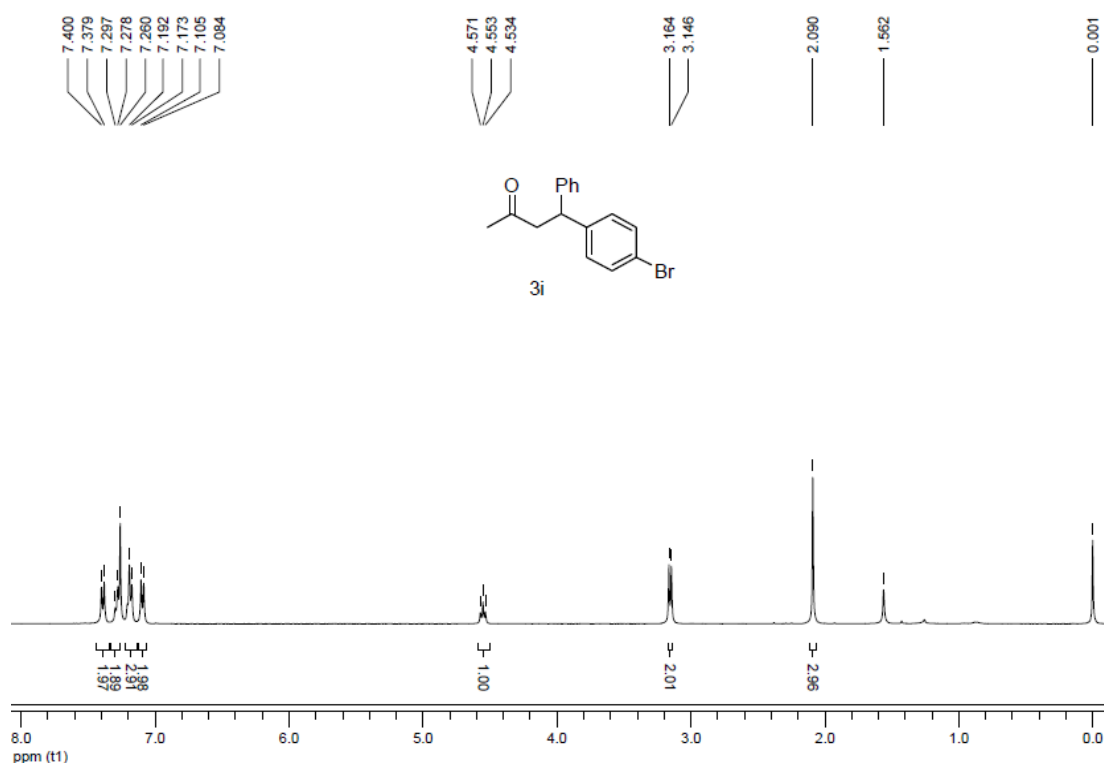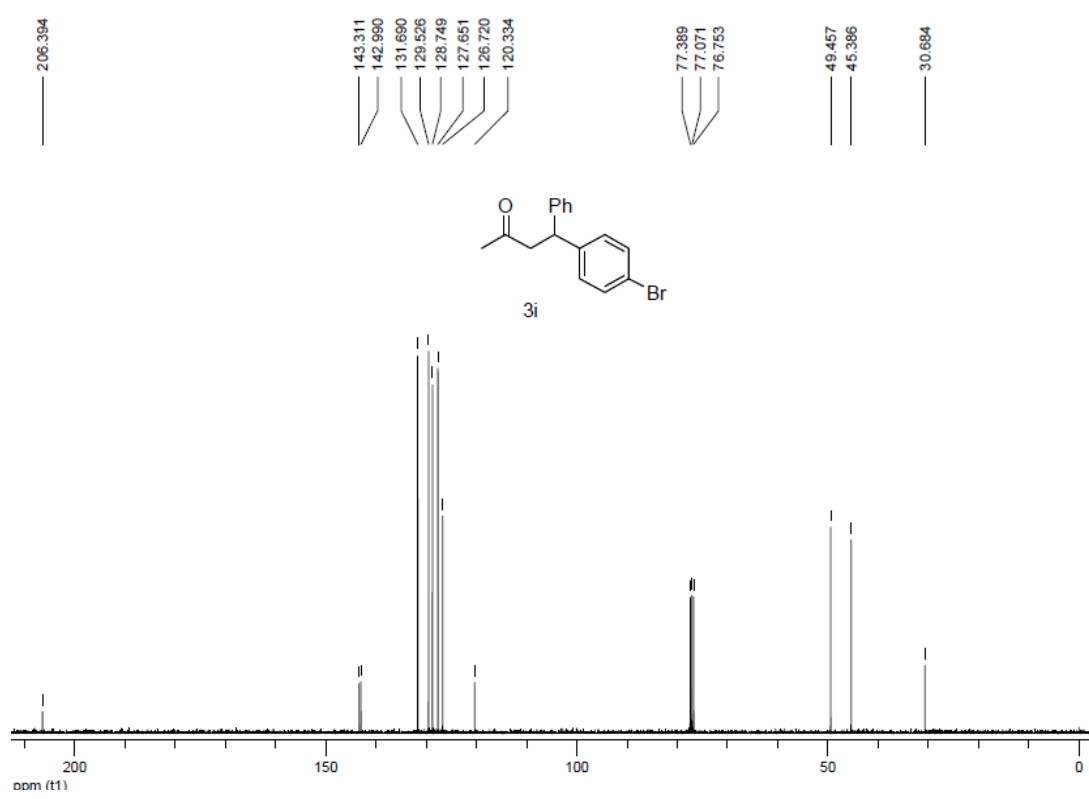

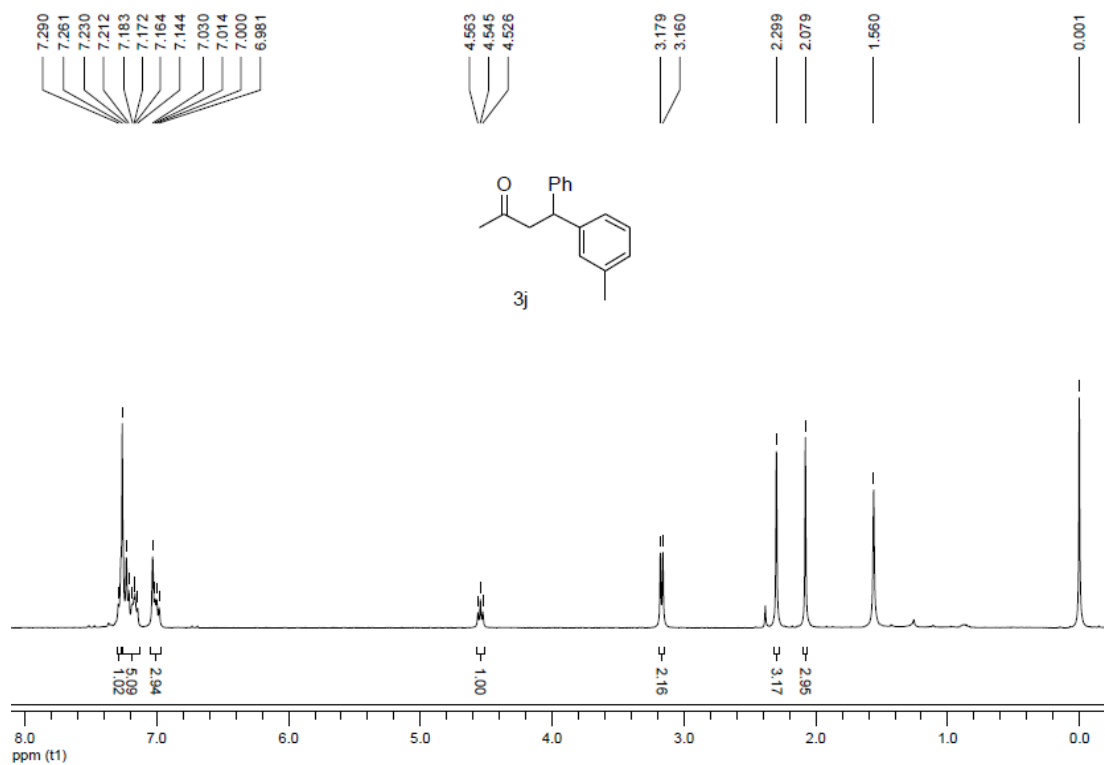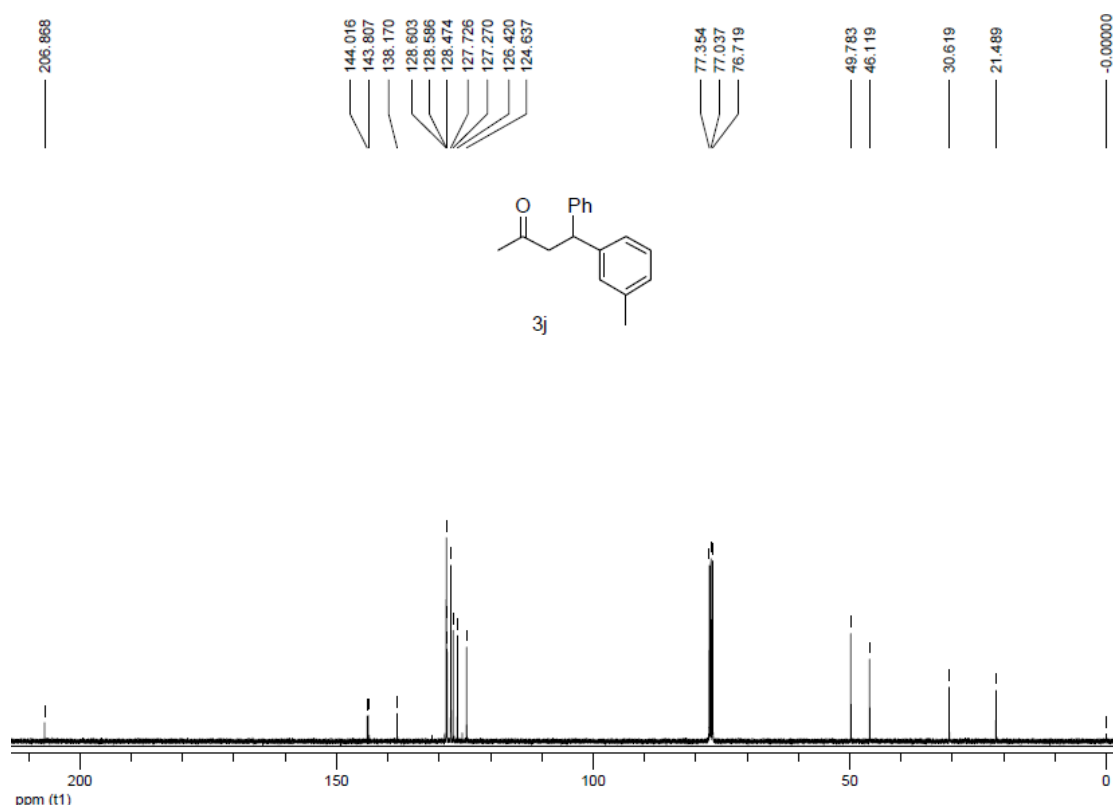

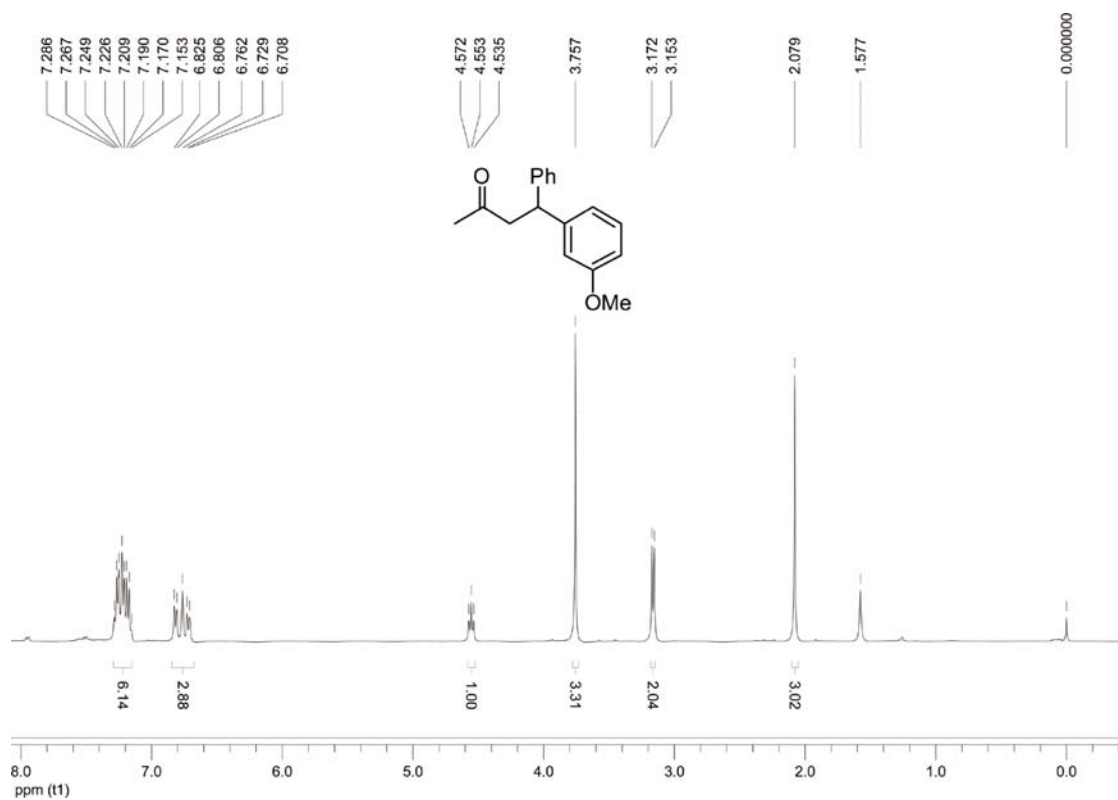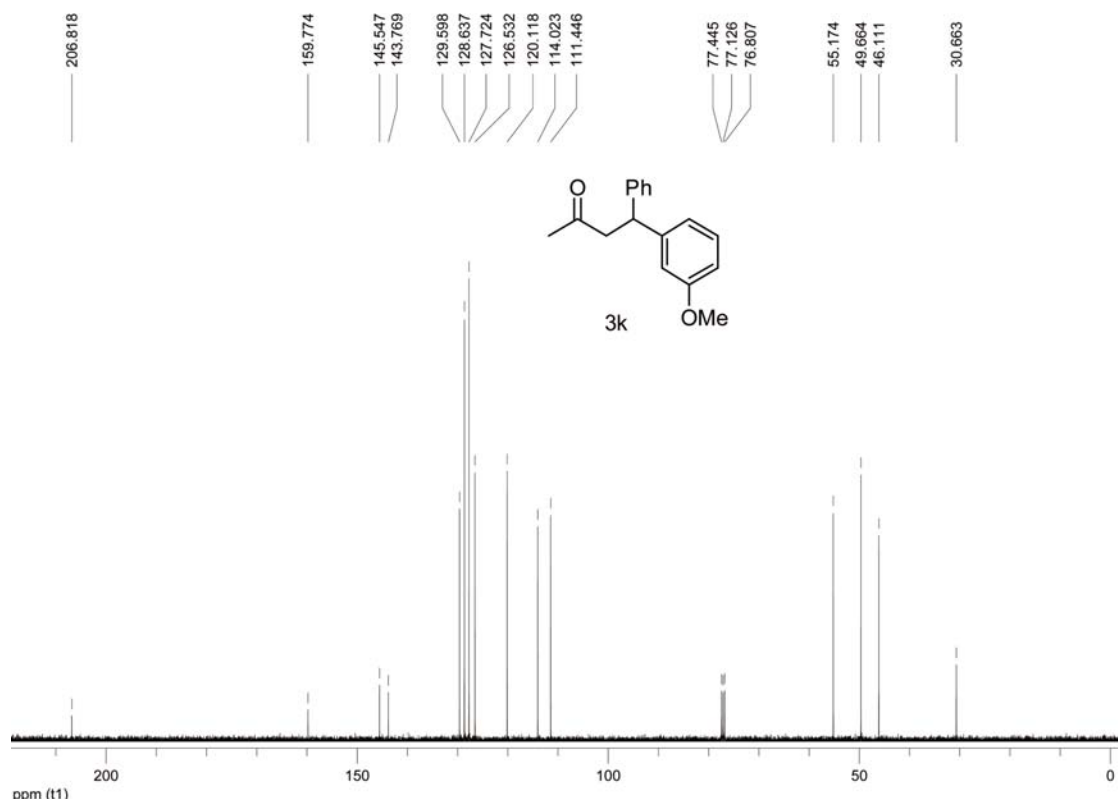

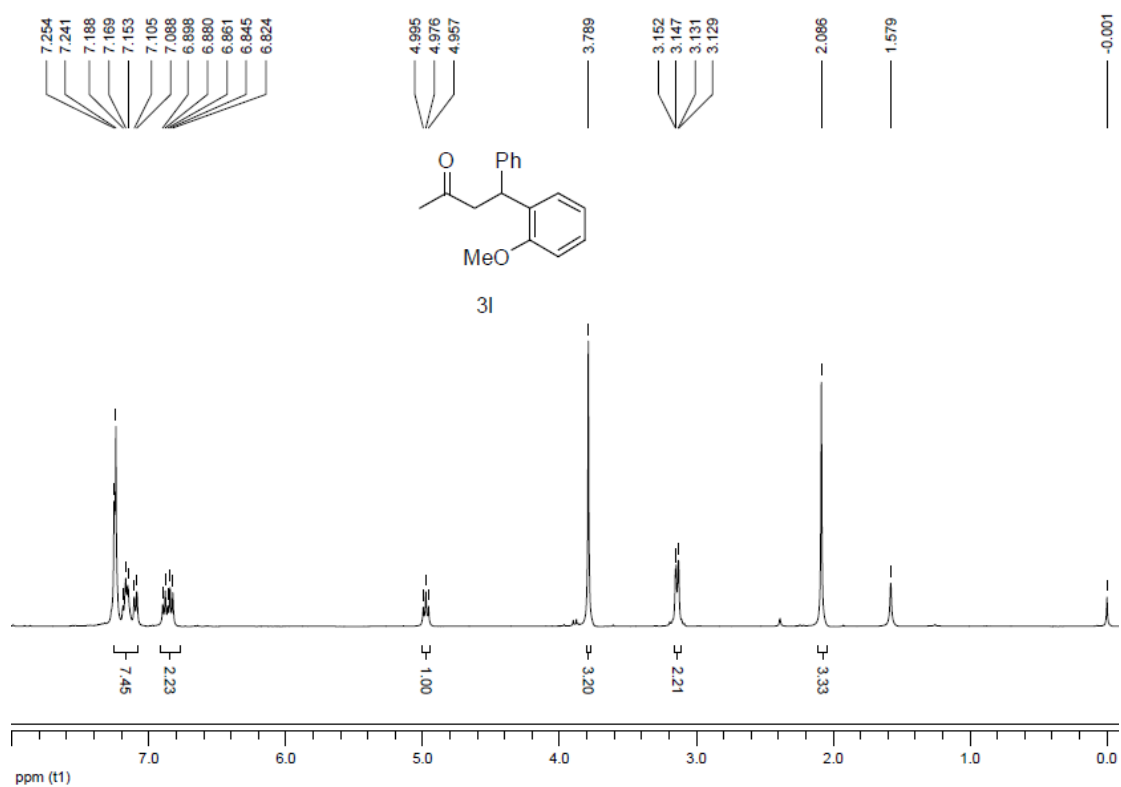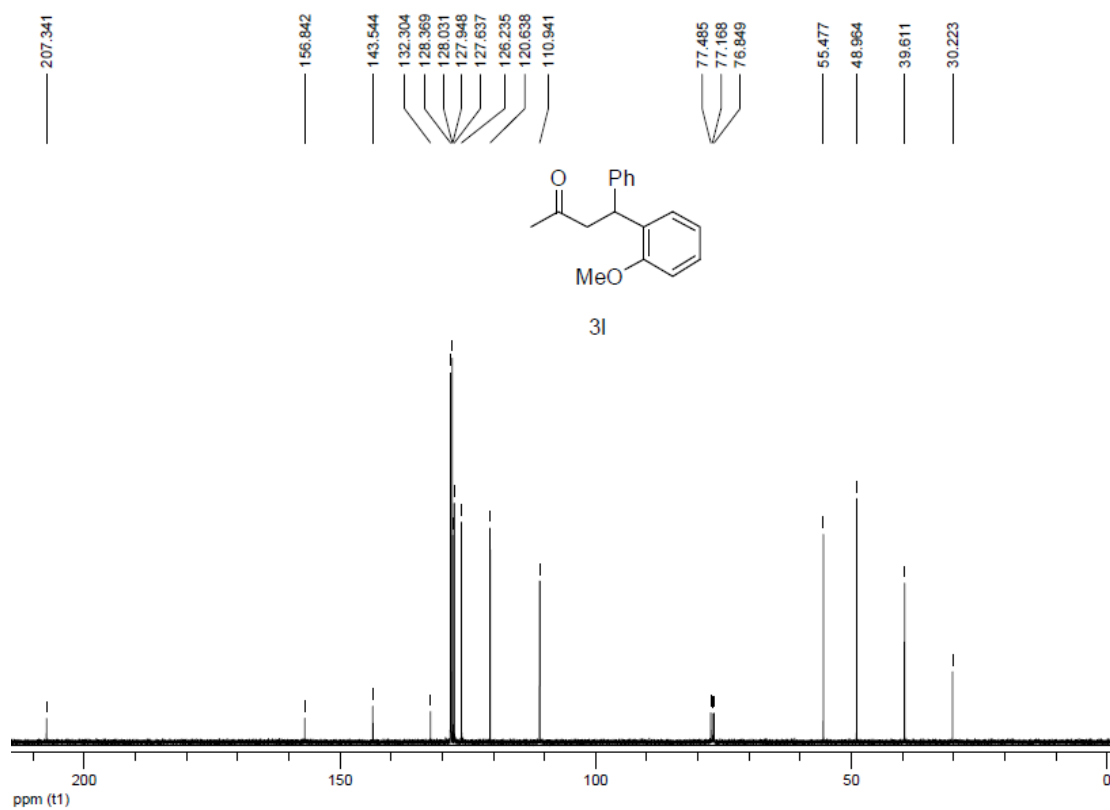

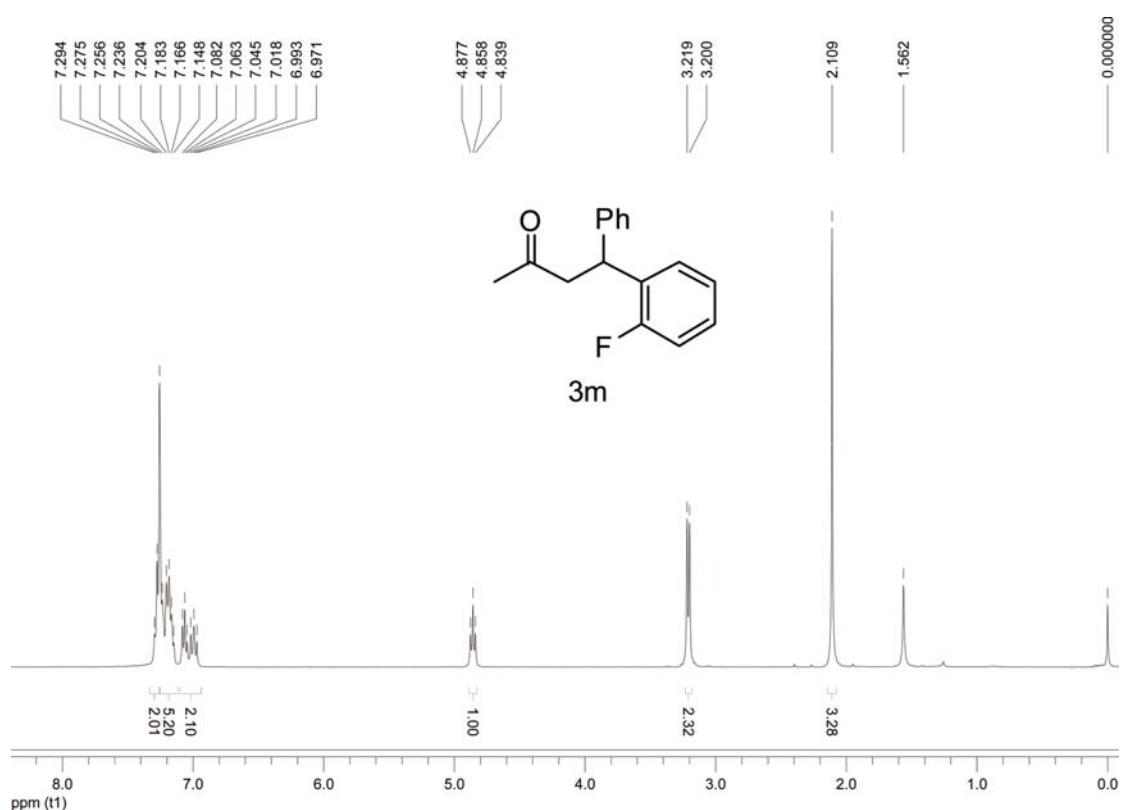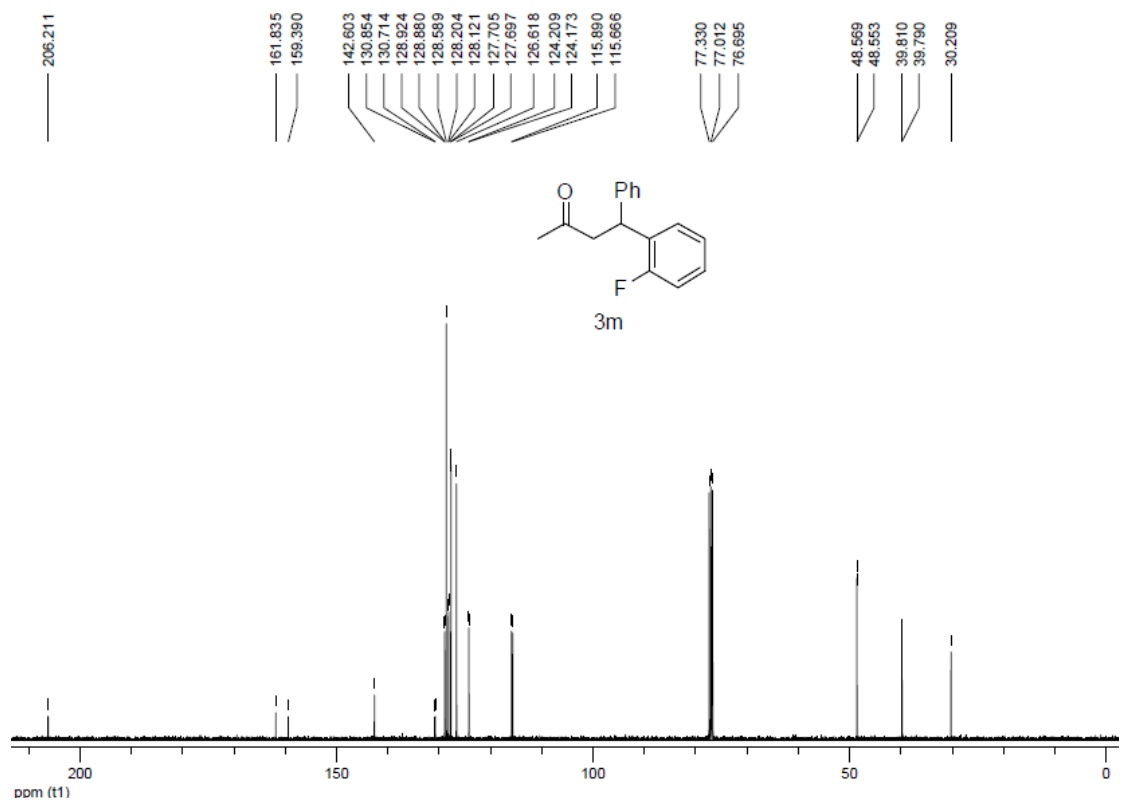

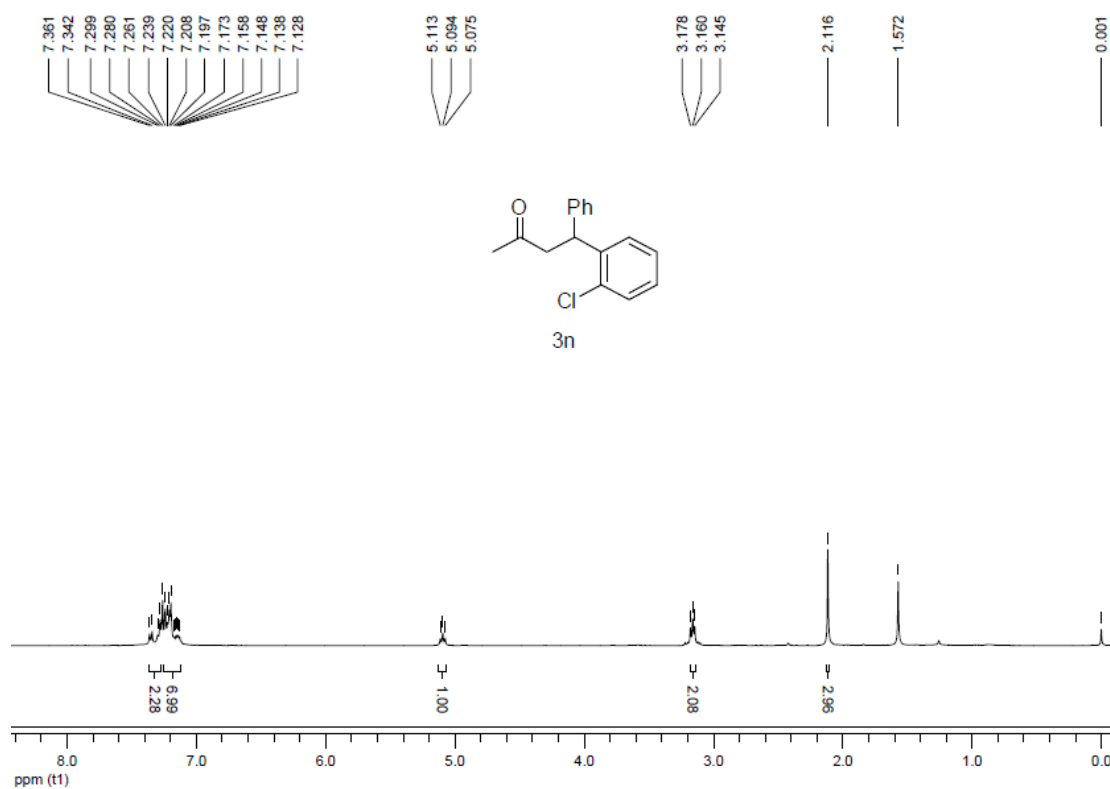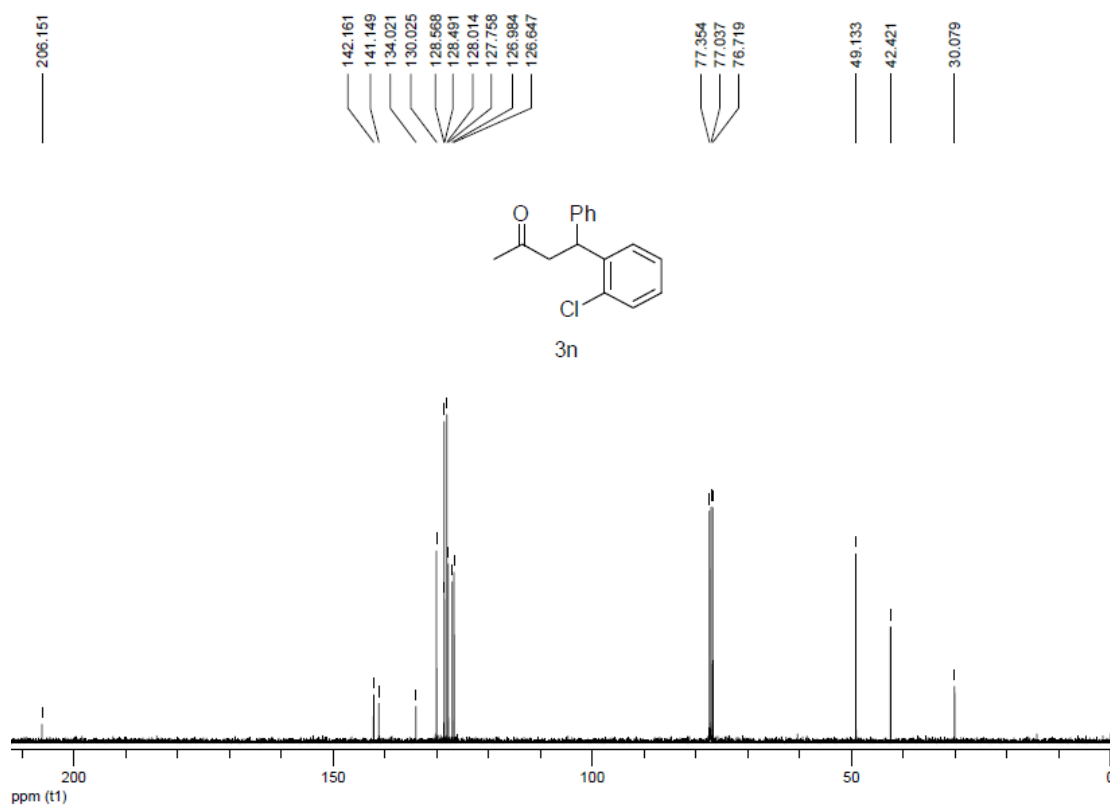

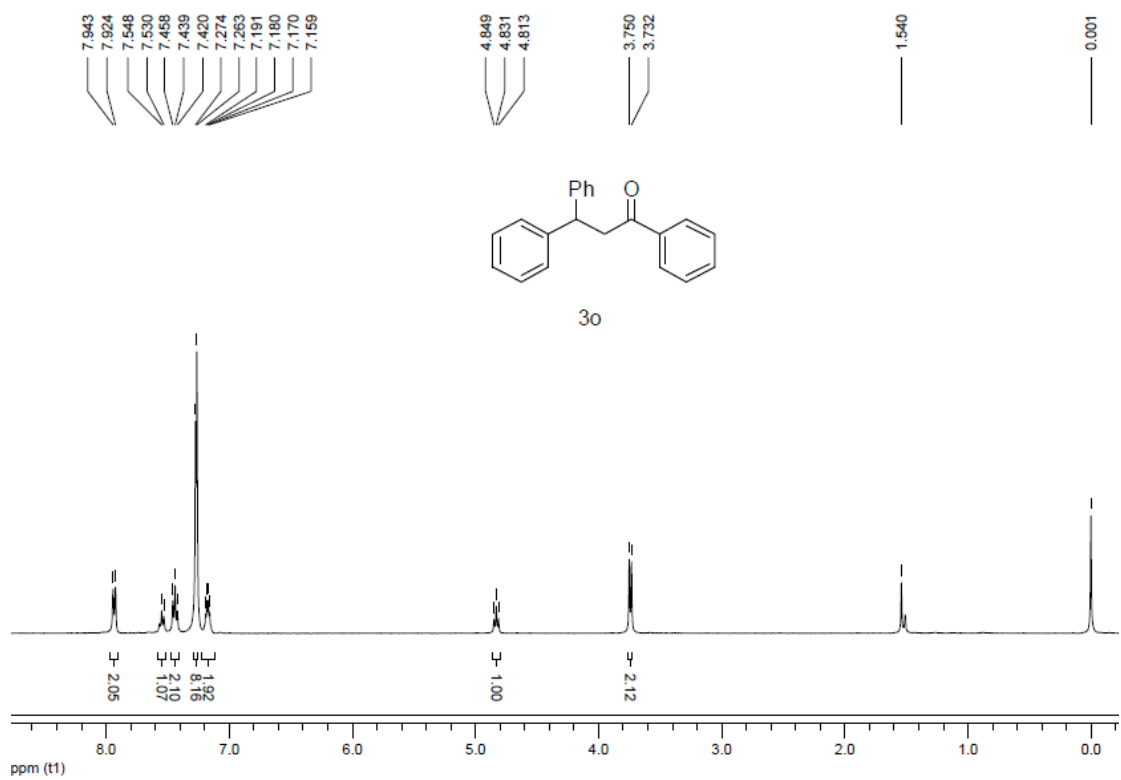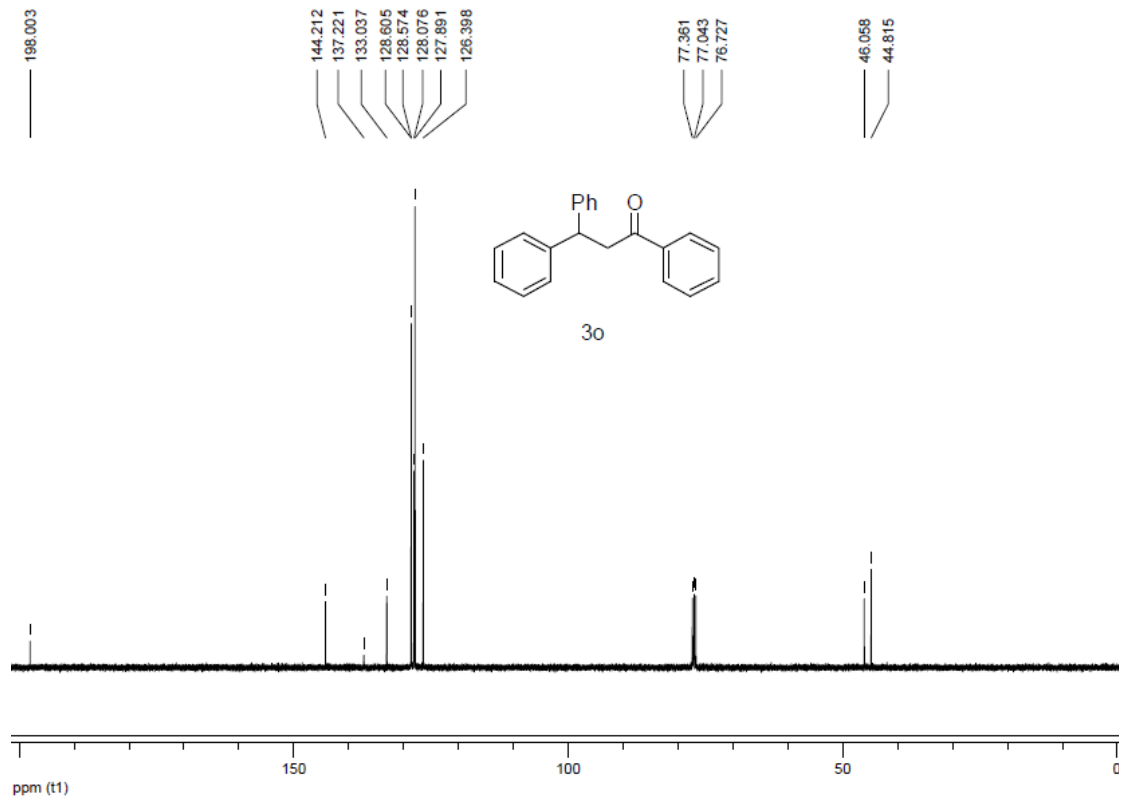

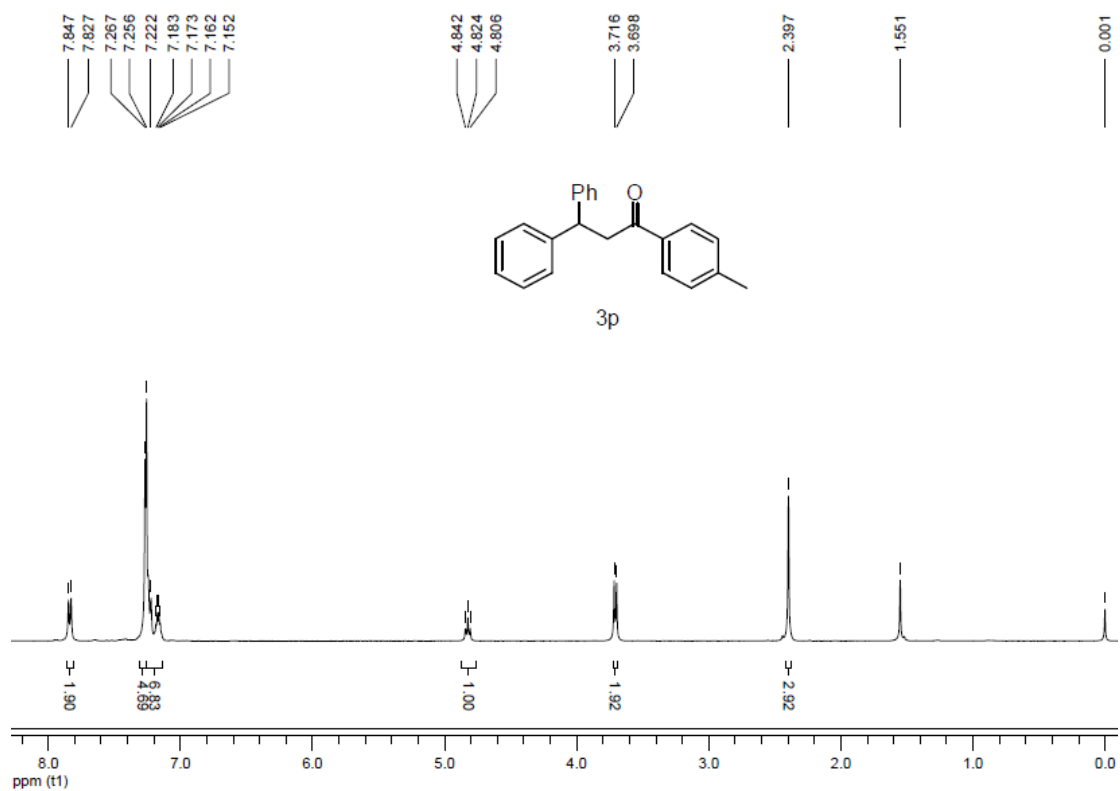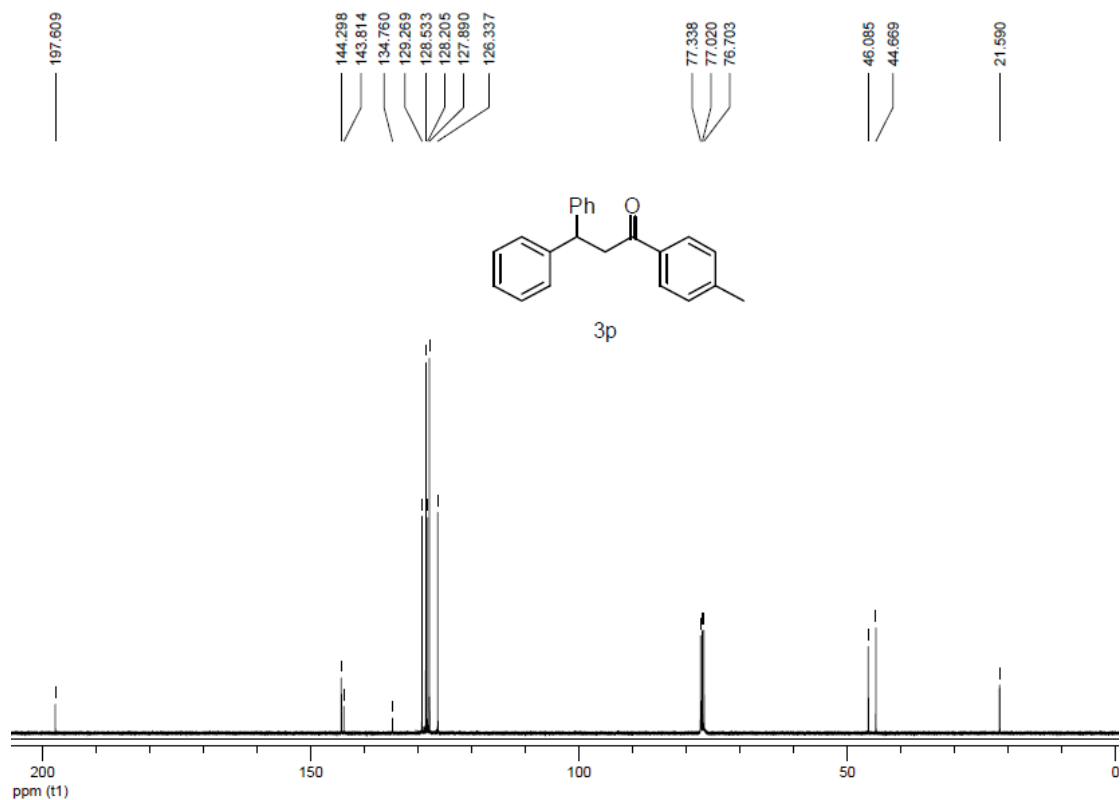

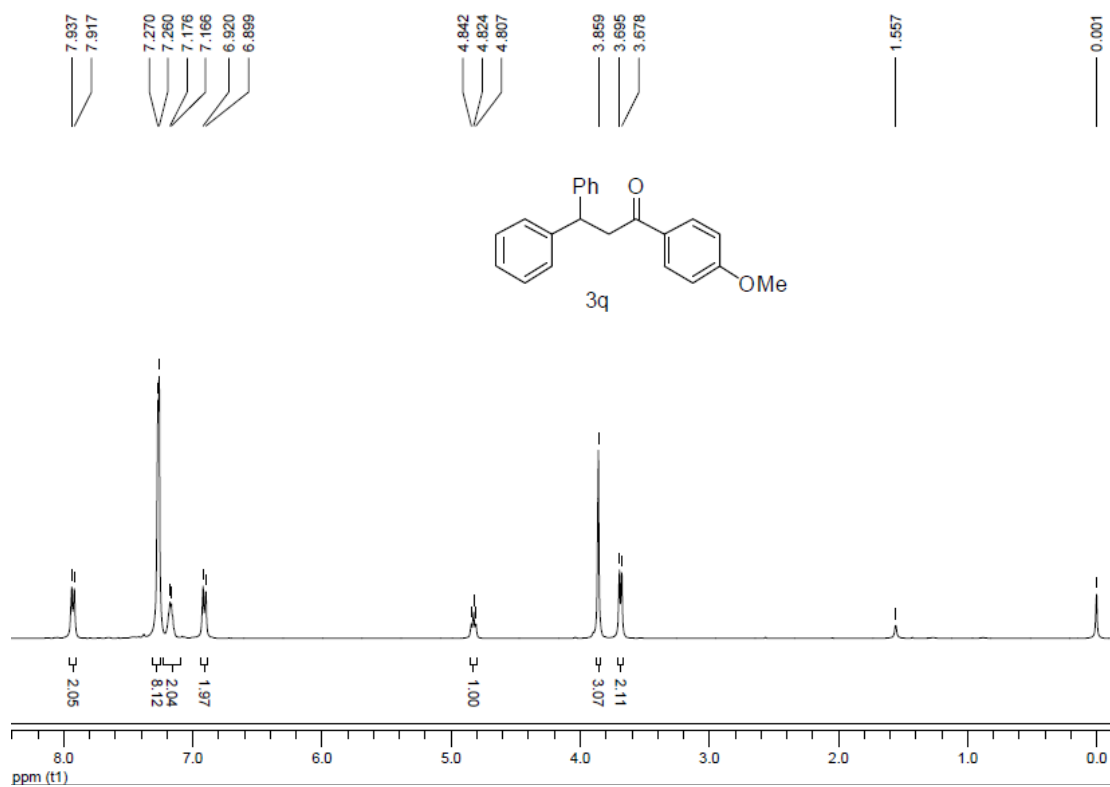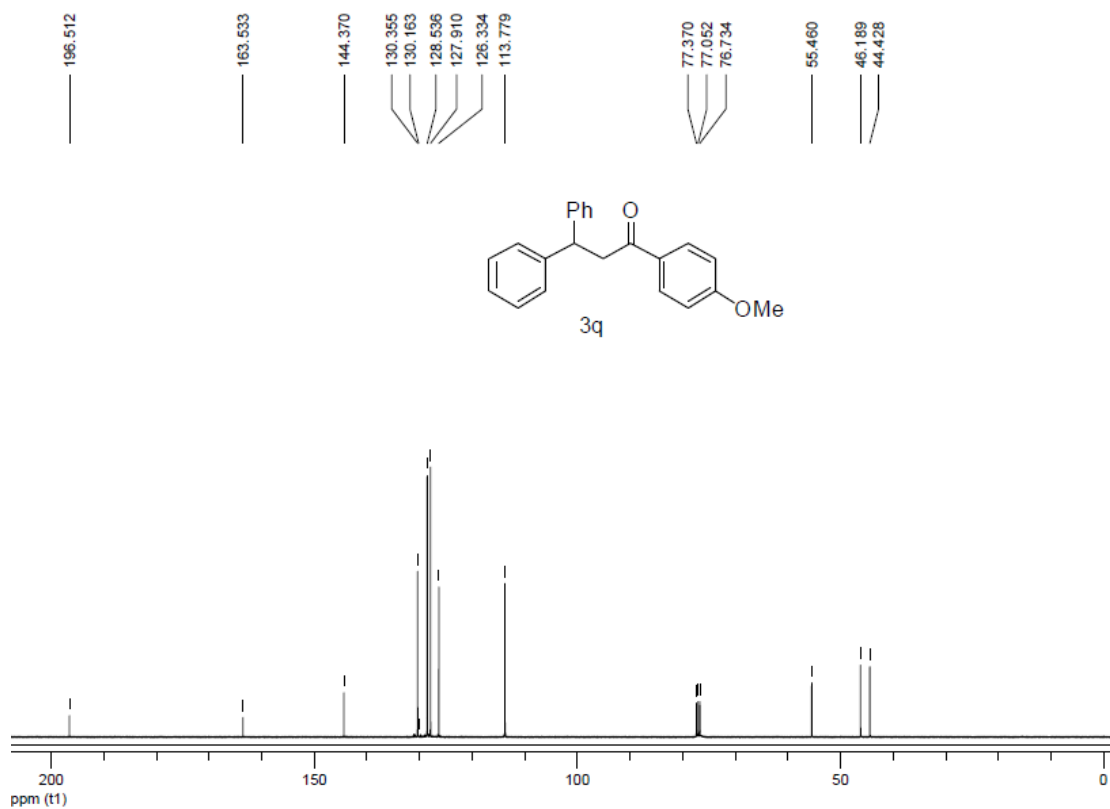

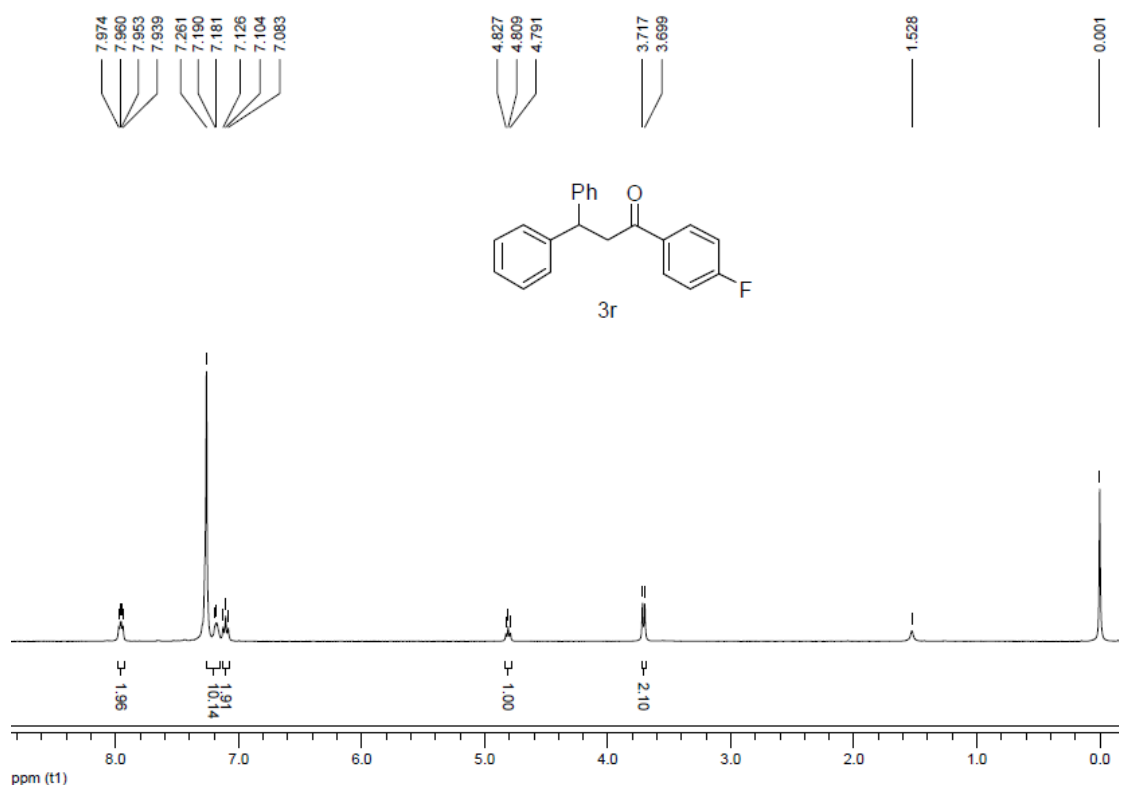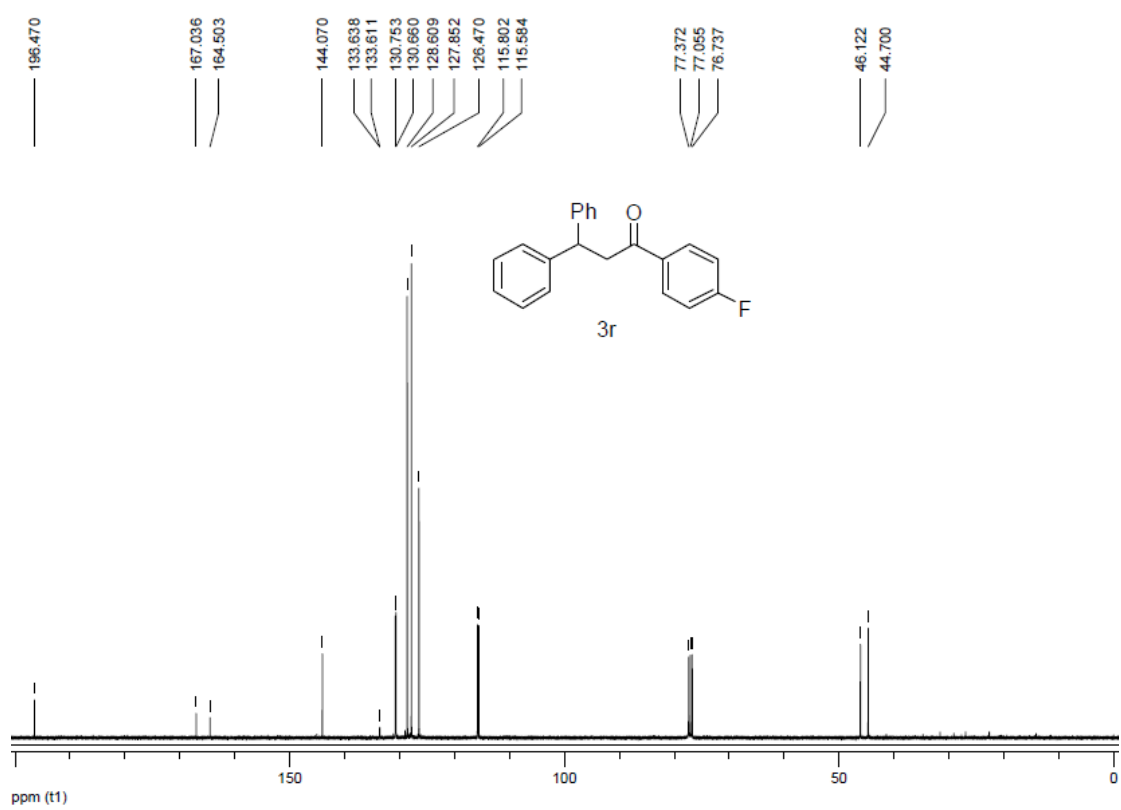

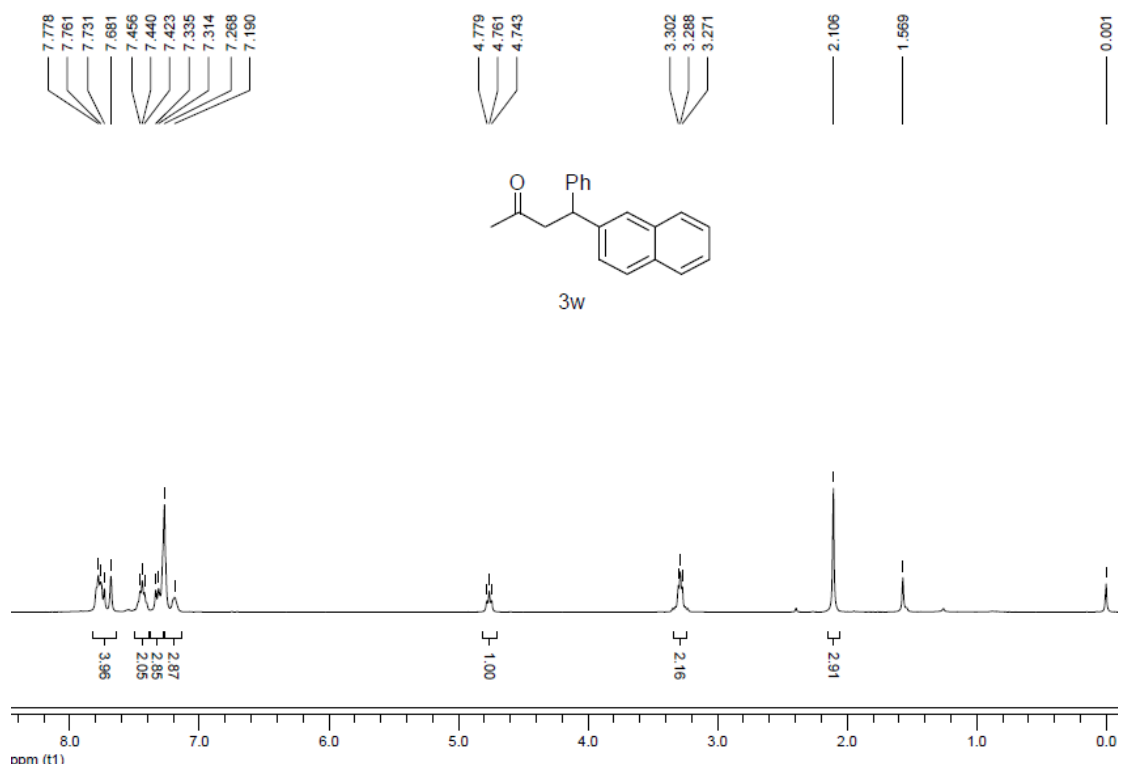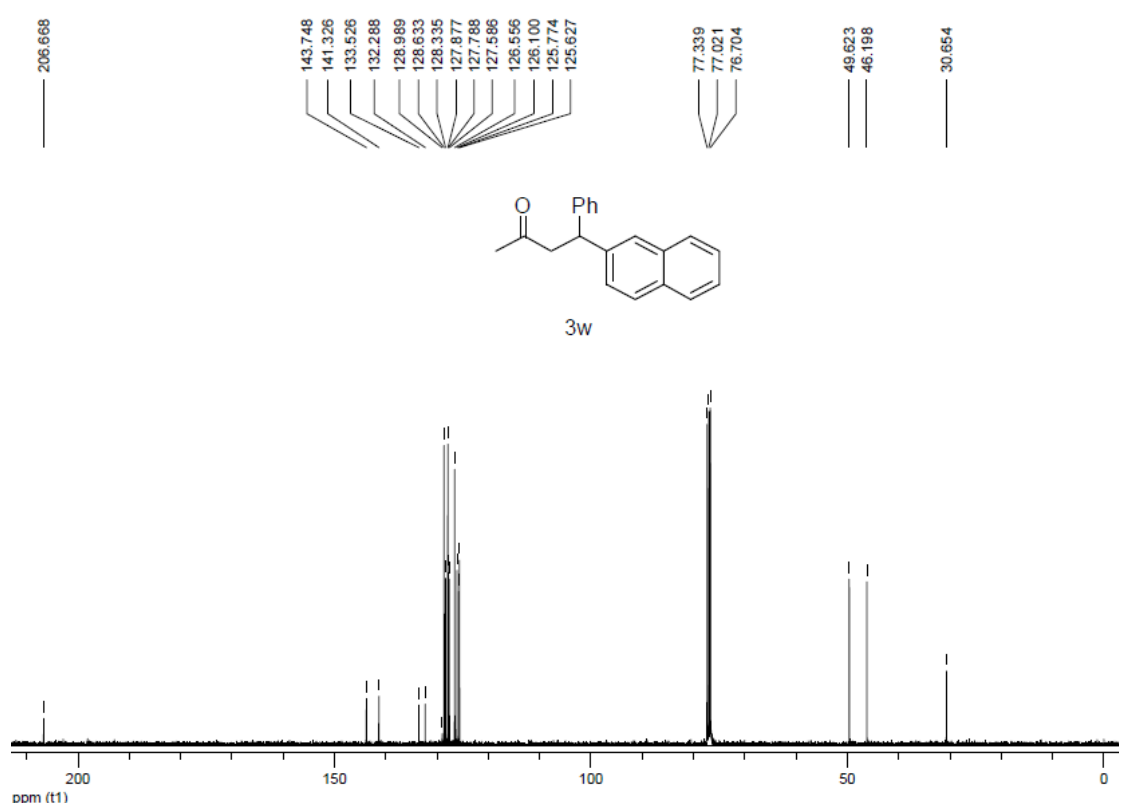

Supplement: c3ob40518d.pdf [file c3ob40518d.pdf]
